# Supplementary material
Source: PubMed Central journal article supplement (PMC11069349)
Supplement: NIHMS1972353-supplement-Supl_Info.pdf [file NIHMS1972353-supplement-Supl_Info.pdf]

# Small Molecule Antiviral Compound Collection (SMACC): A comprehensive, highly curated database to support the discovery of broad-spectrum antiviral drug molecules.

Holli-Joi Martin<sup>1</sup>, Cleber C. Melo-Filho<sup>1</sup>, Daniel Korn<sup>1</sup>, Richard Eastman<sup>2</sup>, Ganesha Rai<sup>2</sup>, Anton Simeonov<sup>2</sup>, Alexey V. Zakharov<sup>2,\*</sup>, Eugene Muratov<sup>1,\*</sup>, Alexander Tropsha<sup>1,\*</sup>

**Table S1.** Overview of Database Entries After Data Curation

| <b>Property</b> | <b>Phenotypic</b> | <b>Target-based</b> |
|-----------------|-------------------|---------------------|
| Viruses         | 13                | 10                  |
| Entries         | 21,392            | 11,123              |
| Assays          | 1,124             | 245                 |
| Cell types      | 53                | -                   |
| Target types    | -                 | 15                  |

## Identification of compounds with multiple antiviral activities

A threshold of 10  $\mu$ M, irrespective of the type of activity measurement, was applied to define the outcome (i.e., if a compound was active or inactive). We chose 10  $\mu$ M as the activity threshold in accordance with the threshold set for an initial hit compound in standard medicinal chemistry campaigns. When the compound activity was reported with ambiguous operators (greater than, “>”, or less than, “<”, certain value), it was annotated as inconclusive. The final definition of the activity call for each compound was based on the concordance of all compound replicate entries tested against the same virus but in different assays (or the same viral target for the target-based dataset). Three outcomes were possible: (i) the compound was active when tested in all assays; (ii) it was active in some assays and inactive in others; and (iii) it was inactive in all assays. In case (i), the compound was considered active while in case (iii), inactive. Any compound in case (ii), with discordant activity calls resulting from different assays, i.e., with at least one activity call different from other ones for the same virus, was considered inconclusive and was not used for the overlap analysis to identify compounds with multiple antiviral activities. A compound was also annotated as inconclusive if the assay reported the compound's activity as “Not

Determined”. Finally, all compounds tested in different viruses (or viral targets in the target-based dataset) were analyzed and those showing activity against two or more viruses were selected as potential BSAs. **Table S2** summarizes our protocols to decide on the final activity calls for compounds included in SMACC database.

**Table S2. Rules for making the final activity calls for compounds in SMACC database.**

| Virus | Assay     | Cell Type | Activity discordance* | Standard Value   | Activity Call |
|-------|-----------|-----------|-----------------------|------------------|---------------|
| same  | same      | same      | no                    | <10 uM or >50%   | active        |
| same  | same      | same      | no                    | >10 uM or <50%   | inactive      |
| any   | any       | any       | no                    | “Not Determined” | inconclusive  |
| same  | same      | same      | yes                   | Any              | inconclusive  |
| same  | different | same      | yes                   | Any              | inconclusive  |
| same  | different | different | yes                   | Any              | inconclusive  |

\* At least one discordant duplicate/replicate compound

### Ontological examination and curation of phenotypic assays reported in ChEMBL

**Table S3.** Curation issues of phenotypic data

| Virus        | # of Entries | # of Assays | Changing BAO Assay Annotation | Assay Type Missing in Description | Cell Type Missing | Cell Type Available in Description | Cell Type Completely Missing |
|--------------|--------------|-------------|-------------------------------|-----------------------------------|-------------------|------------------------------------|------------------------------|
| SARS-CoV-2   | 18,190       | 21          | 18,190                        | 2                                 | 7                 | 0                                  | 7                            |
| MERS-CoV     | 49           | 9           | 49                            | 0                                 | 49                | 49                                 | 0                            |
| HCoV-229E    | 164          | 11          | 164                           | 7                                 | 69                | 65                                 | 5                            |
| Dengue       | 2,685        | 581         | 2,685                         | 191                               | 1,682             | 1,495                              | 187                          |
| Yellow Fever | 930          | 66          | 930                           | 41                                | 169               | 72                                 | 97                           |
| Zika         | 357          | 91          | 357                           | 19                                | 334               | 308                                | 26                           |
| West Nile    | 514          | 102         | 514                           | 81                                | 308               | 148                                | 160                          |
| Powassan     | 24           | 1           | 0                             | 0                                 | 0                 | 0                                  | 0                            |
| RSV          | 2,906        | 239         | 2,862                         | 586                               | 608               | 141                                | 467                          |
| HPIV-3       | 1,632        | 161         | 1,566                         | 435                               | 520               | 96                                 | 421                          |

|               |    |   |    |   |    |    |    |
|---------------|----|---|----|---|----|----|----|
| H1N2          | 61 | 7 | 43 | 0 | 18 | 18 | 0  |
| H7N7          | 26 | 7 | 26 | 0 | 18 | 0  | 18 |
| Sandfly Fever | 24 | 3 | 24 | 0 | 2  | 0  | 2  |

### Analysis of Cell Types

The 21,392 compounds integrated into our database were tested in 53 unique cell types. The most common cell types were Vero C1008 (37.6% of entries), Caco-2 (24.2%), Vero (9.1%), Huh-7 (4.6%), and Hep-2 (3.8%). The high propensity of testing in VeroC1008 cells is explained by a single assay screening against SARS-CoV-2 (8043 entries). Other cell types, such as Caco-2, were used for testing in multiple viruses and amongst various assays. Interestingly, Dengue virus had the greatest number of cell types tested (26), followed by RSV (17), and Zika virus (10) (**Figure 4**). Conversely, Vero cells were tested in the largest number of viruses (9) across 1,956 entries, followed by A549 (7 viruses), and Huh-7 cells (6 viruses).

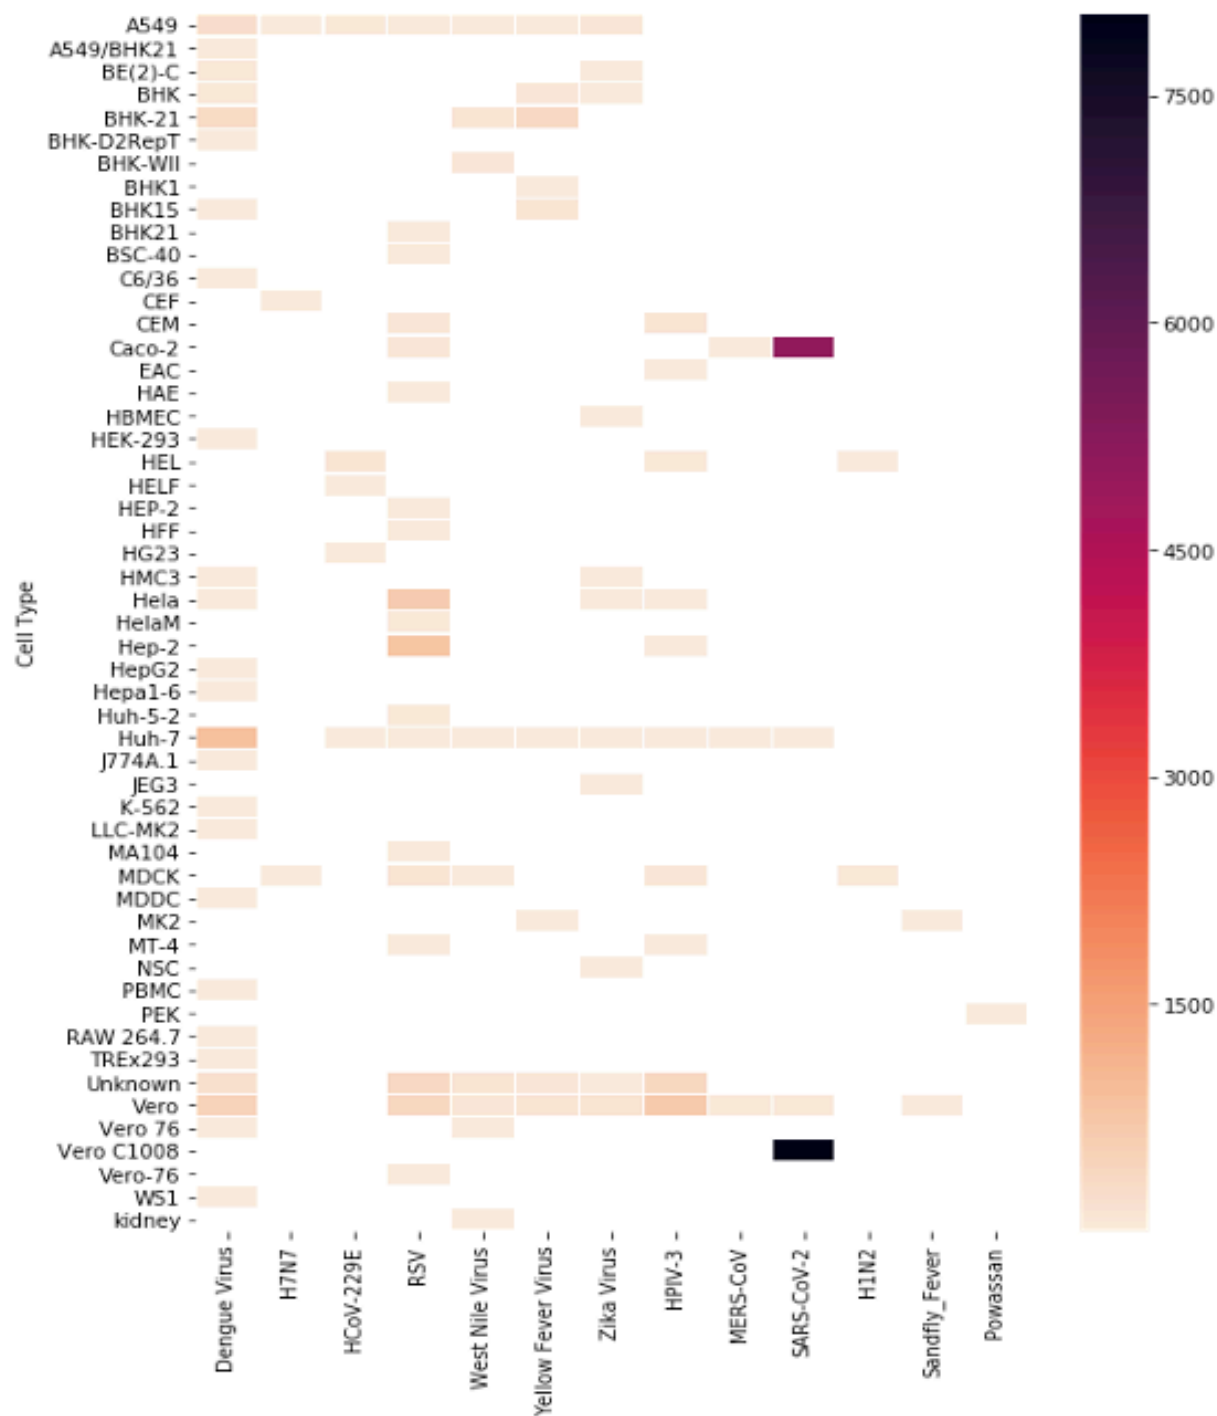

**Figure S1.** Heat map showing distribution of compounds tested in phenotypic screens for different cell types and different viruses.

We analyzed the distribution of compounds tested in phenotypic screens for different cell types and different viruses (Figure S1). We further examined the effect of cell type on the resulting

activity determination using 27 compounds tested in the largest number of phenotypic assays in our database (Table S4). As expected, there were some inconsistencies in the activities determined when stratifying compounds by the virus they were tested against and the cell type for that virus and then comparing their activities. Unknown cell types and inconclusive activity results were ignored. We identified 26 assay results when a compound was tested in the same virus and cell line but showed conflicting results. In another 19 cases, a compound was tested against the same virus but in different cell lines and had different results. In contrast, for 10 cases, we observed completely consistent activity testing results (in 2+ entries) for a compound assayed in the same virus in the same cell line. We also observed 22 cases of consistent activity when compounds were tested for the same virus but in multiple cell lines. There were also many cases reporting a compound tested for a single virus and multiple cell types. In this case, we only analyzed whether or not the activities reported for each cell line were consistent. We observe that the choice of cell type can influence the outcome of the assay. This observation was reported previously (He et al., 2021) and thus, the annotation of a compound as active or inactive against any virus should be always reported strictly in the context of the specific underlying assay. Consequently, integration of data across multiple cell lines, for instance, to increase the size of the data for QSAR model development, should be done with care, i.e., only when evidence exists that compounds show similar activities when tested in different cell lines.

**Table S4.** Analysis of cell type effect on activity of compounds with 10+ entries. Compounds tested in the same virus and cell line that showed conflicting results within that cell line have the cell line annotated as “#”. Compounds tested against the same virus but different cell lines that had different results have that virus designated with “\*”. Compounds with consistent activity testing results (in 2+ entries) for a compound assayed in the same virus in the same cell line show that virus are annotated with “‡”. Compounds with consistent activity when tested for the same virus but in multiple cell lines show that virus are annotated with “+”.

| ChEMBL ID | Virus | Cell Type | Activity (count) |
|-----------|-------|-----------|------------------|
|-----------|-------|-----------|------------------|

|                  |               |                    |                            |                                          |
|------------------|---------------|--------------------|----------------------------|------------------------------------------|
| CHEMBL1421       | Dengue Virus+ | C6/36              | Active(3)                  |                                          |
|                  |               | Huh-7              | Active(4), Inconclusive(1) |                                          |
|                  |               | Unknown            | Active(2)                  |                                          |
|                  |               | Vero               | Active(5), Inconclusive(4) |                                          |
| CHEMBL160        | Dengue Virus* | SARS-CoV-2*        | Caco-2                     | Active(1)                                |
|                  |               |                    | Vero C1008                 | Inactive(1)                              |
|                  |               |                    | Huh-7 #                    | Active(3), Inactive(1)                   |
|                  |               |                    | Vero                       | Inconclusive(1), Active(1)               |
| CHEMBL1630219    | Dengue Virus+ | SARS-CoV-2         | Vero                       | Active(1)                                |
|                  |               | West Nile Virus*   | Huh-7 #                    | Active(3), Inactive(6)                   |
|                  |               |                    | Vero                       | Inconclusive(1), Active(1)               |
|                  |               | Yellow Fever Virus | Huh-7 #                    | Active(2), Inactive(1)                   |
| CHEMBL1630220    | Dengue Virus+ |                    | A549                       | Active(9)                                |
|                  |               |                    | PBMC                       | Active(1)                                |
|                  |               |                    | A549                       | Active(8)                                |
|                  |               |                    | BHK-21                     | Active(4)                                |
| CHEMBL1630221    | Dengue Virus* |                    | PBMC                       | Active(1)                                |
|                  |               | West Nile Virus    | Vero                       | Active(1)                                |
|                  |               |                    | A549 #                     | Inactive(1), Active(6)                   |
|                  |               |                    | BHK-21 #                   | Active(11), Inactive(2), Inconclusive(1) |
| CHEMBL1631361    | Dengue Virus* |                    | HEK-293                    | Active(2)                                |
|                  |               |                    | PBMC                       | Active(1)                                |
|                  |               |                    | Vero                       | Inconclusive(1), Active(5)               |
|                  |               |                    | A549 #                     | Active(5), Inactive(1), Inconclusive(1)  |
| CHEMBL1643       | Dengue Virus* |                    | BHK-21                     | Active(5)                                |
|                  |               | West Nile Virus    | BHK-21                     | Active(1)                                |
|                  |               |                    | BHK-21                     | Inconclusive(1), Active(1)               |
|                  |               |                    | Huh-7 #                    | Inactive(7), Active(1)                   |
| CHEMBL1643       | Dengue Virus* |                    | Unknown                    | Inactive(3)                              |
|                  |               |                    | Vero #                     | Active(1), Inconclusive(1), Inactive(5)  |
|                  |               | H7N7‡              | CEF                        | Inactive(2)                              |
|                  |               | HCoV-229E+         | HEL                        | Inactive(1)                              |
|                  |               |                    | HEL                        | Inactive(1)                              |
|                  |               | HPIV-3*            | CEM                        | Inactive(1)                              |
|                  |               |                    | Hela                       | Inactive(1)                              |
|                  |               |                    | Unknown                    | Active(1), Inactive(15)                  |
|                  |               |                    | Vero #                     | Active(2), Inactive(20)                  |
|                  |               | RSV*               | Caco-2                     | Inactive(1)                              |
|                  |               |                    | Hela #                     | Inactive(7), Active(11)                  |
|                  |               |                    | Hep-2                      | Inconclusive(1), Inactive(12)            |
|                  |               |                    | Unknown #                  | Inactive(17), Active(5)                  |
|                  |               |                    | Vero #                     | Active(3), Inactive(1)                   |
| SARS-CoV-2+      | Caco-2        | Inactive(1)        |                            |                                          |
|                  | Vero C1008    | Inactive(3)        |                            |                                          |
| Sandfly Fever    | MK2           | Active(1)          |                            |                                          |
| West Nile Virus+ | A549          | Inactive(1)        |                            |                                          |

|              |                     |            |                                          |
|--------------|---------------------|------------|------------------------------------------|
|              |                     | BHK-21     | Inconclusive(1), Inactive(1)             |
|              |                     | Huh-7      | Inactive(1)                              |
|              |                     | Unknown    | Inactive(1)                              |
|              |                     | Vero       | Inactive(2)                              |
|              | Yellow Fever Virus* | BHK        | Inactive(1)                              |
|              |                     | BHK-21     | Inactive(3)                              |
|              |                     | MK2        | Active(1)                                |
|              |                     | Vero       | Inactive(2)                              |
|              | Zika Virus          | Unknown    | Inactive(1)                              |
|              |                     | Vero       | Inconclusive(1)                          |
| CHEMBL184    | Dengue Virus        | BHK-21     | Inconclusive(1)                          |
|              |                     | Vero       | Inconclusive(4)                          |
|              | HPIV-3              | Vero       | Inactive(1), Inconclusive(2)             |
|              | RSV+                | Hela       | Inactive(1)                              |
|              |                     | Vero       | Inconclusive(1), Inactive(3)             |
|              | SARS-CoV-2+         | Caco-2     | Inactive(1)                              |
|              |                     | Vero C1008 | Inactive(1)                              |
|              | West Nile Virus     | BHK-21     | Inconclusive(1)                          |
|              | Yellow Fever Virus+ | BHK        | Inactive(1)                              |
|              |                     | BHK-21     | Inactive(3)                              |
| CHEMBL202626 | RSV                 | Hep-2 #    | Active(8), Inactive(2)                   |
| CHEMBL203727 | West Nile Virus*    | BHK-21 #   | Inactive(3), Active(4)                   |
|              |                     | Vero #     | Inactive(3), Active(4)                   |
| CHEMBL204738 | RSV                 | Hep-2 #    | Inactive(6), Active(10)                  |
|              | SARS-CoV-2+         | Caco-2     | Inactive(1)                              |
|              |                     | Vero C1008 | Inactive(1)                              |
| CHEMBL217092 | Dengue Virus*       | C6/36      | Active(3)                                |
|              |                     | Huh-7 #    | Active(3), Inconclusive(1), Inactive(1)  |
|              |                     | Unknown    | Active(2)                                |
|              |                     | Vero       | Active(4), Inconclusive(1)               |
|              | SARS-CoV-2+         | Caco-2     | Inactive(1)                              |
|              |                     | Vero C1008 | Inactive(1)                              |
| CHEMBL219900 | RSV                 | Hep-2 #    | Inconclusive(2), Active(10), Inactive(3) |
| CHEMBL223402 | HPIV-3              | Hep-2      | Inactive(1)                              |
|              | RSV*                | HAE        | Active(7)                                |
|              |                     | Hep-2 #    | Active(21), Inactive(5)                  |
|              | SARS-CoV-2+         | Caco-2     | Inactive(1)                              |
|              |                     | Vero C1008 | Inactive(1)                              |
| CHEMBL31634  | HPIV-3‡             | Unknown    | Inactive(5)                              |
|              |                     | Vero       | Inactive(4)                              |
|              | RSV‡                | Hela       | Inactive(3)                              |
|              |                     | Unknown    | Inactive(6)                              |
|              | SARS-CoV-2+         | Caco-2     | Inactive(1)                              |
|              |                     | Vero C1008 | Inactive(4)                              |
| CHEMBL387388 | RSV                 | Hep-2 #    | Inconclusive(2), Active(9), Inactive(4)  |
| CHEMBL408963 | RSV+                | Hela       | Active(8)                                |
|              |                     | HelaM      | Active(1)                                |
|              |                     | Unknown    | Active(8)                                |

|               |                     |              |                                          |
|---------------|---------------------|--------------|------------------------------------------|
|               | SARS-CoV-2+         | Caco-2       | Inactive(1)                              |
|               |                     | Vero C1008   | Inactive(1)                              |
| CHEMBL4446551 | Dengue Virus‡       | Huh-7        | Inconclusive(2), Active(14)              |
| CHEMBL4538323 | Dengue Virus‡       | Huh-7        | Inconclusive(12), Active(10)             |
| CHEMBL4556306 | Dengue Virus*       | BE(2)-C #    | Active(15), Inactive(8), Inconclusive(5) |
|               |                     | HMC3         | Active(2)                                |
|               | Zika Virus*         | BE(2)-C #    | Active(14), Inactive(7), Inconclusive(2) |
|               |                     | HMC3         | Active(2)                                |
| CHEMBL4571759 | West Nile Virus*    | A549         | Active(1)                                |
|               |                     | Huh-7 #      | Active(4), Inactive(4)                   |
|               |                     | Vero         | Inactive(1)                              |
| CHEMBL494759  | HPIV-3              | Unknown      | Inactive(11)                             |
|               | HPIV-3‡             | Vero         | Inactive(12)                             |
|               | RSV*                | Hela #       | Inactive(10), Active(1)                  |
|               |                     | Unknown      | Inactive(10)                             |
| CHEMBL564201  | Dengue Virus        | BHK-21       | Inconclusive(1)                          |
|               |                     | Unknown      | Active(1)                                |
|               | RSV‡                | Vero         | Active(8)                                |
|               | West Nile Virus     | BHK-21       | Inconclusive(1)                          |
|               |                     | Unknown      | Active(1)                                |
|               | Yellow Fever Virus+ | BHK          | Inactive(3)                              |
|               |                     | BHK-21       | Inactive(4)                              |
| CHEMBL682     | Dengue Virus‡       | BHK-21       | Active(4)                                |
|               | SARS-CoV-2+         | Huh-7        | Active(2)                                |
|               |                     | Vero         | Active(1)                                |
|               |                     | Vero C1008   | Active(2)                                |
|               | Zika Virus+         | NSC          | Active(1)                                |
|               |                     | Vero         | Active(1)                                |
| CHEMBL6948    | HPIV-3              | Vero         | Inactive(1)                              |
|               | RSV‡                | Hela         | Active(9)                                |
|               | Yellow Fever Virus  | Vero         | Inactive(1)                              |
| CHEMBL76      | Dengue Virus        | BHK-21       | Active(1)                                |
|               | SARS-CoV-2+         | Huh-7        | Active(2)                                |
|               |                     | Vero         | Active(1)                                |
|               | Zika Virus*         | HBMEC        | Active(1)                                |
|               |                     | NSC          | Active(1)                                |
|               |                     | Vero #       | Active(1), Inactive(3)                   |
| CHEMBL866     | Dengue Virus+       | BHK-21       | Inconclusive(1)                          |
|               |                     | BHK-D2RepT   | Active(1)                                |
|               |                     | Huh-7        | Active(1)                                |
|               |                     | Vero         | Active(2)                                |
|               | HPIV-3+             | Hela         | Active(1)                                |
|               |                     | Vero         | Active(1)                                |
|               | RSV‡                | Vero         | Inconclusive(1), Active(3)               |
|               | SARS-CoV-2*         | Caco-2       | Inactive(1)                              |
|               |                     | Vero C1008 # | Active(2), Inactive(5)                   |
|               | West Nile Virus+    | BHK-21       | Inconclusive(1), Active(1)               |
|               |                     | Vero         | Active(1)                                |



|                     |        |             |
|---------------------|--------|-------------|
| Yellow Fever Virus* | BHK    | Inactive(1) |
|                     | BHK-21 | Inactive(3) |
|                     | Vero   | Active(2)   |

## Compounds with activity against 2 viruses in phenotypic assays

**Table S5.** Compounds active against two viruses in phenotypic assays.

| Molecule ID   | SMILES                                                                                                                                                     | Active                            | Inactive                      |
|---------------|------------------------------------------------------------------------------------------------------------------------------------------------------------|-----------------------------------|-------------------------------|
| CHEMBL393857  | <chem>NC1C=CN(C2OC(CO)([N-][N+]#N)C(O)C2O)C(=O)N=1</chem>                                                                                                  | RSV, Dengue Virus                 | SARS-CoV-2                    |
| CHEMBL3769592 | <chem>CCN1CCN(CC1)C(c1ccccc1)c1ccc(Cl)cc1</chem>                                                                                                           | RSV, Dengue Virus                 |                               |
| CHEMBL2016758 | <chem>CC1(OC(CO)C(O)C1O)c1ccc2c(N)[n]c[n]12</chem>                                                                                                         | RSV, HPIV-3                       | Dengue Virus, West Nile Virus |
| CHEMBL3417243 | <chem>NC1C=CN(C2OC(CO)(CC1)C(O)C2F)C(=O)N=1</chem>                                                                                                         | RSV, HPIV-3                       | SARS-CoV-2                    |
| CHEMBL2017637 | <chem>Cc1ccc(NC(=O)C(C)Sc2[n]c3ccccc3[n]2-c2ccc(cc2)OC)c(Cl)c1</chem>                                                                                      | RSV, HPIV-3                       |                               |
| CHEMBL491005  | <chem>Clc1cc(ccc1)N1CCN(CC1)C=CN=Nc1ccccc1</chem>                                                                                                          | RSV, Yellow Fever Virus           |                               |
| CHEMBL491006  | <chem>Clc1ccc(cc1)N1CCN(CC1)C=CN=Nc1ccccc1</chem>                                                                                                          | RSV, Yellow Fever Virus           |                               |
| CHEMBL491007  | <chem>C(F)(F)c1cc(ccc1)N1CCN(CC1)C=CN=Nc1ccccc1</chem>                                                                                                     | RSV, Yellow Fever Virus           |                               |
| CHEMBL2304286 | <chem>c1ccc(CC2C(=O)OC(C)C(NC(=O)C(CC(C)C)N(C)C(C)C3CCCN3C(=O)C(C)O)C(=O)NC(C(O)CC(=O)OC(C)C(=O)C(C)C(=O)NC(CC(C)C)C(=O)N3CCCCC3C(=O)N2C)C(C)CC)cc1</chem> | Sandfly Fever, Yellow Fever Virus |                               |
| CHEMBL2059155 | <chem>Nc1[n]cc(Br)c2c1[n]c[n]2C1C=C(CO)C(O)C1O</chem>                                                                                                      | HPIV-3, Dengue Virus              | West Nile Virus               |
| CHEMBL4441971 | <chem>C(C=Cc1ccccc1)NC(CC1CCCCC1)C(=O)NC(CC1CCNC1=O)C(=O)C(=O)NCc1ccccc1</chem>                                                                            | MERS-CoV, HCoV-229E               |                               |
| CHEMBL4590737 | <chem>C(C)CC(NC(=O)C=Cc1ccccc1)C(=O)NC(CC1CCNC1=O)C(=O)C(=O)NCc1ccccc1</chem>                                                                              | MERS-CoV, HCoV-229E               |                               |
| CHEMBL1197690 | <chem>c1cc(Nc2ccc(cc2)OCc2ccccc2Cl)c2cc(ccc2[n]1)OCC</chem>                                                                                                | Dengue Virus, West Nile Virus     |                               |
| CHEMBL1630220 | <chem>C(C)C(=O)OCC1OC([n]2cc(c3c2[n]c[n]3N)C(N)=O)C(O)(C#C)C1OC(=O)C(C)C</chem>                                                                            | Dengue Virus, West Nile Virus     |                               |
| CHEMBL1652113 | <chem>OCC1C(O)C(O)C(O)CN1CCCCC1(O)CCCCC1</chem>                                                                                                            | Dengue Virus, West Nile Virus     |                               |
| CHEMBL3542231 | <chem>C(C)C1OC2(CC3CC(CC=C(C)C)OC4CC(OC5CC(O)C(O)C(C)O5)C(OC)C(C)O4)C(C)C=CC=C4COC5C(O)C(C)=CC(C(=O)O3)C45O)O2)CCCC1C</chem>                               | Dengue Virus, West Nile Virus     |                               |
| CHEMBL3578024 | <chem>*1=CN(C2CC(C(CO[Si](C)(C)C(C)C(C)O2)[n]2[n][n]c2-c2ccc3cc(ccc3e2)OC)C(=O)NC1=O</chem>                                                                | Dengue Virus, West Nile Virus     |                               |
| CHEMBL3578025 | <chem>*1=CN(C2CC(C(CO[Si](C)(C)C(C)C(C)O2)[n]2[n][n]c2-c2ccc3cc(ccc3e2)OC)C(=O)NC1=O</chem>                                                                | Dengue Virus, West Nile Virus     |                               |
| CHEMBL3578026 | <chem>*1=CN(C2CC(C(CO[Si](C3CCCCC3)(c3ccccc3)C(C)C)O2)[n]2[n][n]c2-c2ccc3cc(ccc3e2)OC)C(=O)NC1=O</chem>                                                    | Dengue Virus, West Nile Virus     |                               |
| CHEMBL3578034 | <chem>*1=CN(C2CC(C(CO[Si](C)(C)C(C)C(C)O2)[n]2[n][n]c2-c2ccc3ccccc32)C(=O)NC1=O</chem>                                                                     | Dengue Virus, West Nile Virus     |                               |
| CHEMBL3578035 | <chem>*1=CN(C2CC(C(CO[Si](C)(C)C(C)C(C)O2)[n]2[n][n]c2-c2ccc(cc2)-c2ccccc2)C(=O)NC1=O</chem>                                                               | Dengue Virus, West Nile Virus     |                               |
| CHEMBL3578036 | <chem>*1=CN(C2CC(C(CO[Si](C)(C)C(C)C(C)O2)[n]2[n][n]c2-c2ccc(cc2)Oc3ccccc32)C(=O)NC1=O</chem>                                                              | Dengue Virus, West Nile Virus     |                               |
| CHEMBL3578039 | <chem>*1=CN(C2CC(C(CO[Si](C)(C)C(C)C(C)O2)[n]2[n][n]c2C2CCCC2)C(=O)NC1=O</chem>                                                                            | Dengue Virus, West Nile Virus     |                               |
| CHEMBL3578040 | <chem>*1=CN(C2CC(C(CO[Si](C)(C)C(C)C(C)O2)[n]2cc([n][n]2)-c2ccc3cc(ccc3e2)OC)C(=O)NC1=O</chem>                                                             | Dengue Virus, West Nile Virus     |                               |
| CHEMBL3578041 | <chem>*1=CN(C2CC(C(CO[Si](C)(C)C(C)C(C)O2)[n]2cc([n][n]2)-c2cc3ccccc3c3ccccc32)C(=O)NC1=O</chem>                                                           | Dengue Virus, West Nile Virus     |                               |
| CHEMBL3578049 | <chem>*1=CN(C2CC(NC(=O)C3cc4ccc(cc4cc3)OC)C(CO[Si](C)(C)C(C)C(C)O2)C(=O)NC1=O</chem>                                                                       | Dengue Virus, West Nile Virus     |                               |

|                      |                                                                                                              |                                  |                 |
|----------------------|--------------------------------------------------------------------------------------------------------------|----------------------------------|-----------------|
| <b>CHEMBL3578057</b> | <chem>C1=CN(C2CC(NC(=O)c3cc4ccccc4cc3)C(CO[Si](C)(C)C(C)(C)O2)C(=O)NC1=O</chem>                              | Dengue Virus, West Nile Virus    |                 |
| <b>CHEMBL3578063</b> | <chem>C1=CN(C2CC(NS(=O)(=O)c3cc4ccccc4cc3)C(CO[Si](C)(C)C(C)(C)O2)C(=O)NC1=O</chem>                          | Dengue Virus, West Nile Virus    |                 |
| <b>CHEMBL3578066</b> | <chem>C1=CN(C2CC(NC(=O)c3ccc(cc3)N3CCOCC3)C(CO[Si](C)(C)C(C)(C)O2)C(=O)NC1=O</chem>                          | Dengue Virus, West Nile Virus    |                 |
| <b>CHEMBL3578067</b> | <chem>C1=CN(C2CC(NC(=O)Nc3ccccc3)C(CO[Si](C)(C)C(C)(C)O2)C(=O)NC1=O</chem>                                   | Dengue Virus, West Nile Virus    |                 |
| <b>CHEMBL3578068</b> | <chem>C1=CN(C2CC(NC(=O)NS(=O)(=O)c3ccc(C)cc3)C(CO[Si](C)(C)C(C)(C)O2)C(=O)NC1=O</chem>                       | Dengue Virus, West Nile Virus    |                 |
| <b>CHEMBL408500</b>  | <chem>CCCCCCCCCN1CC(O)C(O)C(O)C1CO</chem>                                                                    | Dengue Virus, West Nile Virus    |                 |
| <b>CHEMBL4164410</b> | <chem>Cc1c[n]([n][n]1)-c1ccc(cc1)NC(=O)Nc1ccccc1C</chem>                                                     | Dengue Virus, West Nile Virus    |                 |
| <b>CHEMBL73809</b>   | <chem>CC1(O)C(OC(CO)C1O)[n]1c[n]c2c(N)[n]c[n]c12</chem>                                                      | Dengue Virus, West Nile Virus    |                 |
| <b>CHEMBL251056</b>  | <chem>OC1CC2C(NC(=O)c3cc4OCOc4cc32)C(O)C1O</chem>                                                            | Dengue Virus, Yellow Fever Virus | Sandfly_Fever   |
| <b>CHEMBL3736249</b> | <chem>Oc1ccc(cc1)-[n]1[n]c2cc(Cl)c(Cl)cc2[n]1</chem>                                                         | Dengue Virus, Yellow Fever Virus | West Nile Virus |
| <b>CHEMBL400092</b>  | <chem>OC1C=C2CCN3Cc4cc5OCOc5cc4C(C32)C1O</chem>                                                              | Dengue Virus, Yellow Fever Virus | Sandfly_Fever   |
| <b>CHEMBL419335</b>  | <chem>c1c2OCOc2cc2C3C(NC(=O)c12)C(O)C(O)C(O)C3O</chem>                                                       | Dengue Virus, Yellow Fever Virus | Sandfly_Fever   |
| <b>CHEMBL476486</b>  | <chem>yc1c2C(=O)NC3C(O)C(O)C(O)CC=3c2cc2OCOc12</chem>                                                        | Dengue Virus, Yellow Fever Virus | Sandfly_Fever   |
| <b>CHEMBL586091</b>  | <chem>COc1cc2CN3CCC4=CC(O)C(O)C(C34)c2cc1O</chem>                                                            | Dengue Virus, Yellow Fever Virus | Sandfly_Fever   |
| <b>CHEMBL98745</b>   | <chem>yc1c2OCOc2cc2c1C(=O)NC1C(O)C(O)C(O)C=C21</chem>                                                        | Dengue Virus, Yellow Fever Virus | Sandfly_Fever   |
| <b>CHEMBL3339396</b> | <chem>O=C(NCc1ccc(cc1)-c1cc[n]cc1)c1[n]cc[n]c1C(=O)Nc1ccc(F)cc1</chem>                                       | Dengue Virus, Yellow Fever Virus |                 |
| <b>CHEMBL3339398</b> | <chem>O=C(NCc1ccc(cc1)-c1c[n]ccc1)c1[n]cc[n]c1C(=O)Nc1ccc(F)cc1</chem>                                       | Dengue Virus, Yellow Fever Virus |                 |
| <b>CHEMBL463048</b>  | <chem>OC1C(O)C2NC(=O)c3cc4OCOc4cc3C2=CC1O</chem>                                                             | Dengue Virus, Yellow Fever Virus |                 |
| <b>CHEMBL487798</b>  | <chem>OC1C2C(NC(=O)c3cc4OCOc4cc32)C(O)C(O)C1O</chem>                                                         | Dengue Virus, Yellow Fever Virus |                 |
| <b>CHEMBL98481</b>   | <chem>COc1c(cc(cc1OC)C=Cc1cc(O)c(cc1)OC)OC</chem>                                                            | Dengue Virus, Yellow Fever Virus |                 |
| <b>CHEMBL67</b>      | <chem>Oc1cc2c(NC(C)CCCN(CC)CC)c3ccc(Cl)cc3[n]e2cc1</chem>                                                    | Dengue Virus, Zika Virus         | SARS-CoV-2      |
| <b>CHEMBL7568</b>    | <chem>Oc1cc2c(NC(C)CCCN(CC)CC)c3ccc(Cl)cc3[n]e2cc1</chem>                                                    | Dengue Virus, Zika Virus         | SARS-CoV-2      |
| <b>CHEMBL172</b>     | <chem>C1CCCCN1)c1cc([n]e2c(cccc21)C(F)(F)F)C(F)(F)F</chem>                                                   | Dengue Virus, Zika Virus         |                 |
| <b>CHEMBL330407</b>  | <chem>COc1c(cc(cc1OC)C=Cc1cc(N)c(cc1)OC)OC</chem>                                                            | Dengue Virus, Zika Virus         |                 |
| <b>CHEMBL4454990</b> | <chem>C1CCOCc1c([n]c([n]c1Nc1ccc(cc1)S(N)(=O)=O)NIC(COCC1)C(=O)NCCOc1ccccc1</chem>                           | Dengue Virus, Zika Virus         |                 |
| <b>CHEMBL4518162</b> | <chem>yc1c(cc(cc1OC)C=Cc1cc(NC(=O)C(CO)NC(=O)C(C)C(N)=N)NC(=O)C(CCCNC(N)=N)NC(=O)c2ccccc2)c(cc1)OC)OC</chem> | Dengue Virus, Zika Virus         |                 |
| <b>CHEMBL464432</b>  | <chem>Oc1c2C(=O)NC3C(CC(O)C(O)C3O)c2cc2OCOc12</chem>                                                         | Yellow Fever Virus, Dengue Virus | Sandfly_Fever   |
| <b>CHEMBL448322</b>  | <chem>COC(=O)c1[s]c([n]c1C(Br)Br)-c1ccc(Cl)cc1</chem>                                                        | Yellow Fever Virus, Dengue Virus |                 |
| <b>CHEMBL236207</b>  | <chem>CC1(O)C(OC(CO)C1O)[n]1ccc2c(N)[n]c[n]c12</chem>                                                        | West Nile Virus, Zika Virus      | Dengue Virus    |

## Cluster Analysis Methodology

The curated compound structures were submitted to hierarchical cluster analysis in KNIME v.4.1.4 (Berthold et al., 2007) integrated with python v.3.7.3 (SciPy and Matplotlib libraries) and using RDKit descriptors (RDKit v.4.2.0). The optimal number of clusters was determined by the software default Euclidean distance cut-off.

### Cluster analysis of active compounds in phenotypic assays

The structural clustering of all compounds tested in phenotypic cell-based assays revealed ten clusters (**Figure S2, Figure S3, Table S6**). The top BSA compounds, CHEMBL4437334 and CHEMBL4454780, active against four different viruses, are in clusters #7 and #5, respectively. The subcluster containing CHEMBL4437334 (cluster #7) has 847 compounds. Among them, some nearest neighbors of CHEMBL4437334 (**Figure S3**) were active against SARS-CoV-2 and could be further tested against a panel of flaviviruses (Dengue, West Nile, Yellow Fever, and Zika). The subcluster of CHEMBL4454780 (cluster #5) contains 1,406 compounds; the nearest neighbors of CHEMBL4454780 are presented in **Figure S3**. Compounds CHEMBL1197690, CHEMBL3581155, and CHEMBL7568 were active against one or two flaviviruses and could be further tested against additional flaviviruses and viruses from other families like RSV and MERS-CoV. Likewise, CHEMBL4303559 was only tested and active against SARS-CoV-2 and could be tested against members of *Flaviviridae* and other coronaviruses such as MERS-CoV.

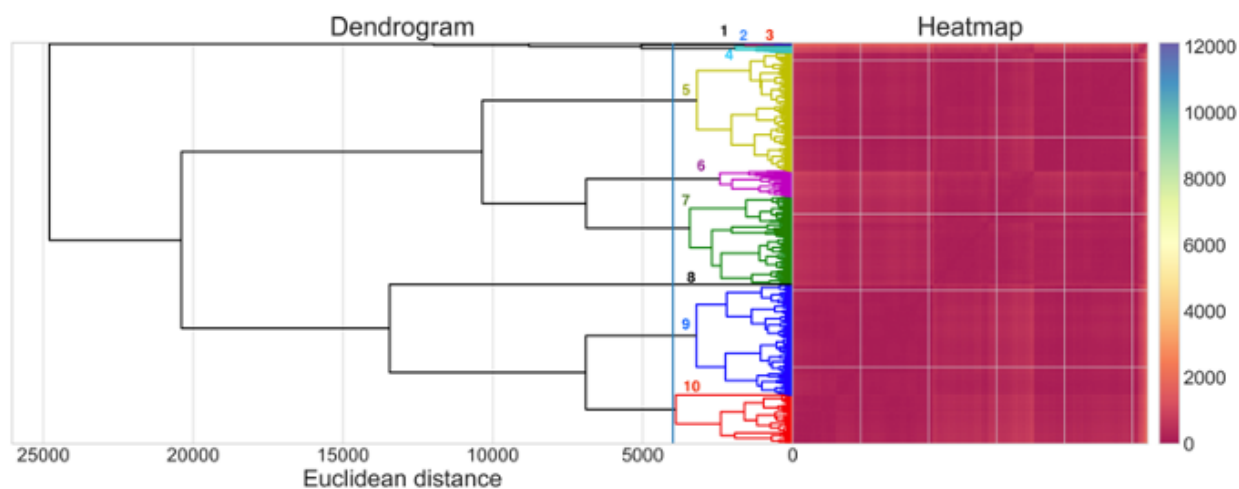

**Figure S2.** Clustering of compounds from the phenotypic cell-based assays by chemical structure. The colors from the heatmap are based on the Euclidean distances between compounds. Colors nearer to dark red indicate a shorter distance between molecules.

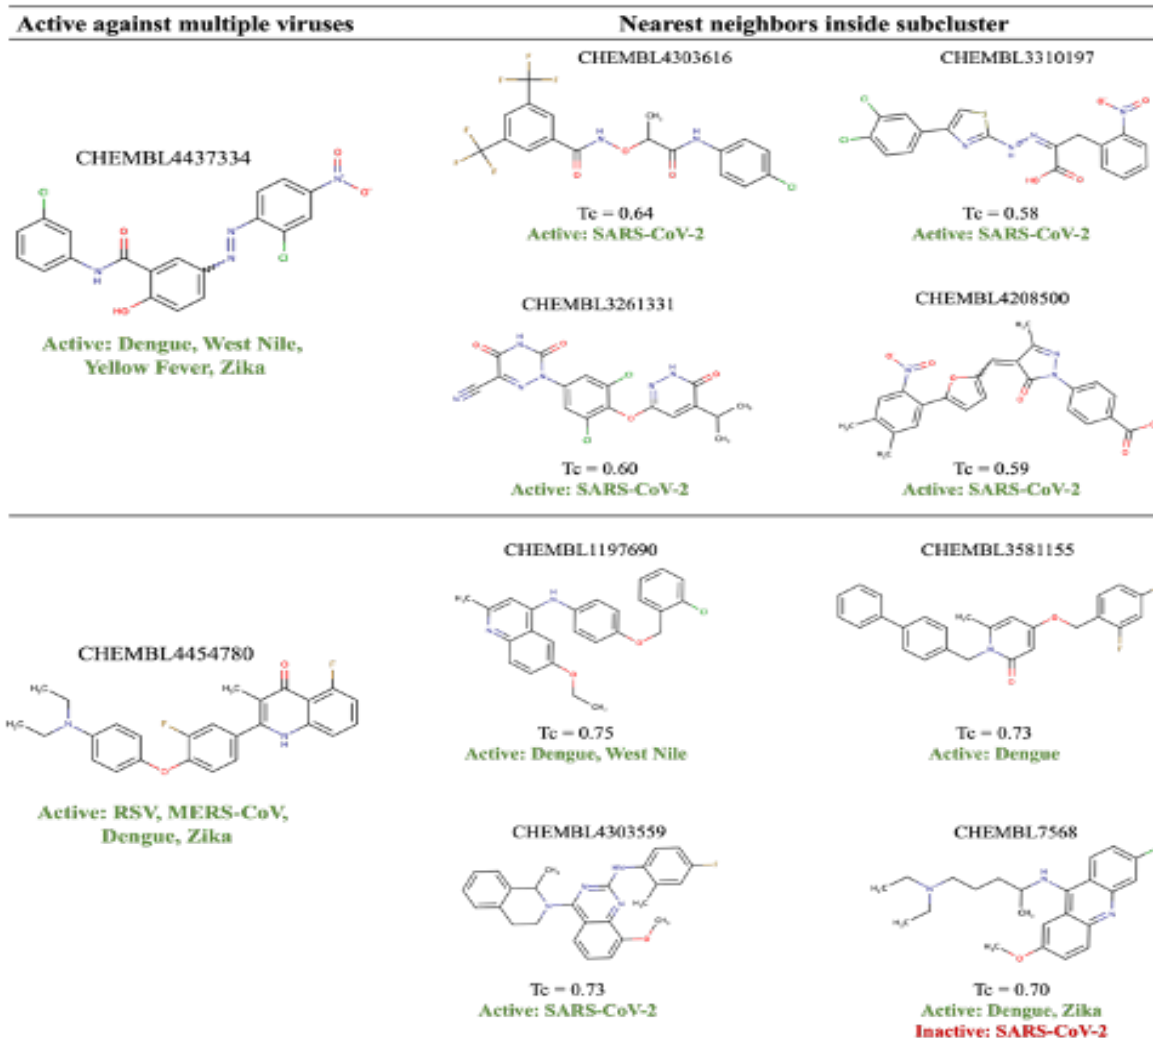

**Figure S3.** Examples of compounds similar to experimental broad-spectrum hits that could be further tested against multiple viruses of interest.

**Table S6.** Examples of compounds of each cluster from phenotypic data.

| Cluster | Representative compound | Structure | Active against | Inactive against |
|---------|-------------------------|-----------|----------------|------------------|
|         |                         |           |                |                  |

---

1

CHEMBL4206744

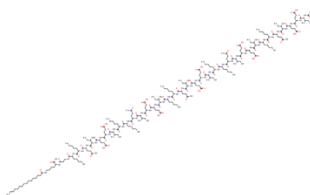

MERS-CoV

---

2

CHEMBL2414866

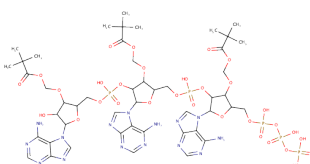

RSV

---

3

CHEMBL2304286

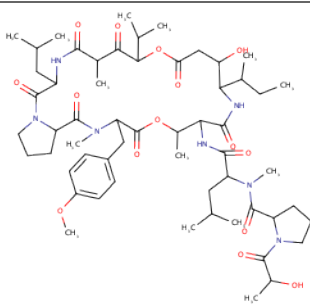

Sandfly Fever,  
Yellow Fever  
Virus

---

4

CHEMBL3542231

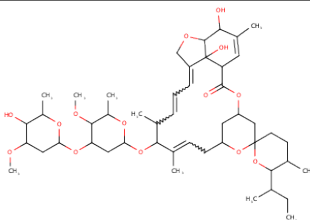

Dengue Virus,  
West Nile Virus

---

5

CHEMBL4454780

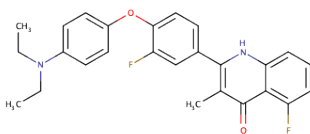

RSV, MERS-  
CoV, Dengue  
Virus, Zika  
Virus

---

6

CHEMBL3578024

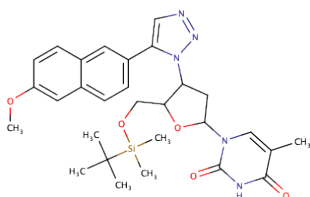

Dengue Virus,  
West Nile Virus

---

|    |               |  |                                                                           |
|----|---------------|--|---------------------------------------------------------------------------|
| 7  | CHEMBL4437334 |  | Dengue Virus,<br>West Nile Virus,<br>Yellow Fever<br>Virus, Zika<br>Virus |
| 8  | CHEMBL2016757 |  | RSV, HPIV-3,<br>Dengue Virus<br>West Nile<br>Virus                        |
| 9  | CHEMBL2042315 |  | Dengue Virus                                                              |
| 10 | CHEMBL46486   |  | SARS-<br>CoV-2                                                            |

## Target-based Clustering Analysis

Structural clustering of all compounds revealed 11 clusters (**Figure S4, Figure S5, Table S7**). CHEMBL4544781 was active against targets from different viral families (NS5 of Zika Virus and RDRP of MERS-CoV) and is in cluster #7 along with 867 other compounds; nearest neighbors of CHEMBL4544781 are presented in **Figure S5**. CHEMBL1630221 was only tested (and active) against the NS5 Polymerase of Zika Virus and could be further tested against other polymerases from other flaviviruses and the RNA-Dependent RNA Polymerase (RdRP) of MERS-CoV. Three other nearest neighbors of CHEMBL4544781 were only tested (and active) against SARS-CoV-2 Main Protease ( $M^{Pro}$ ). These compounds could be further tested against polymerases of Zika and MERS-CoV.

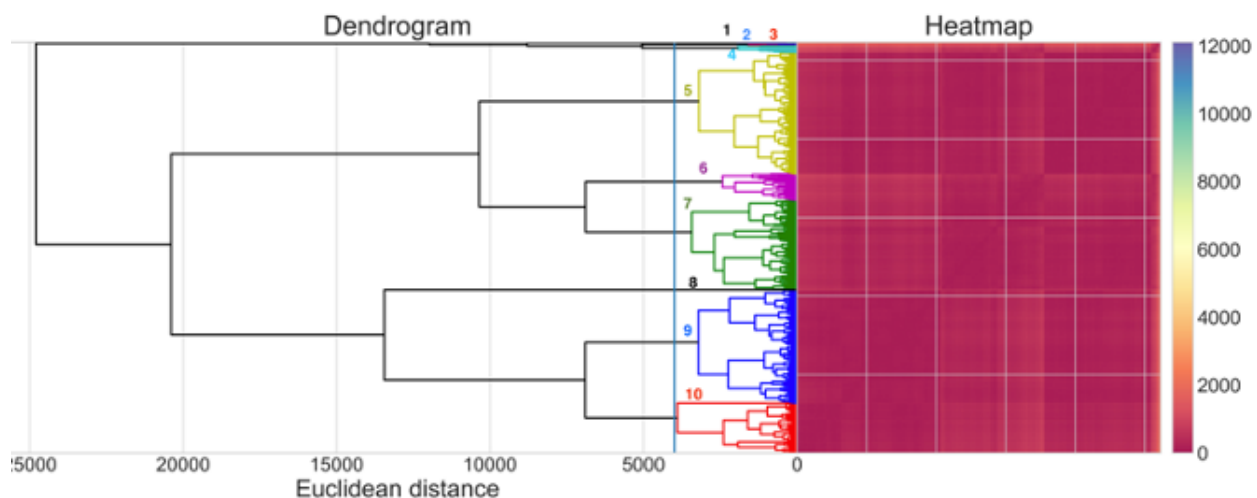

**Figure S4.** Clustering analysis of compounds from the target-based assays. The colors from the heatmap are based on the Euclidean distances between compounds. Colors nearer to dark red indicate a shorter distance between molecules.

---

**Active against different viruses**

---

---

**Nearest neighbors inside subcluster**

---

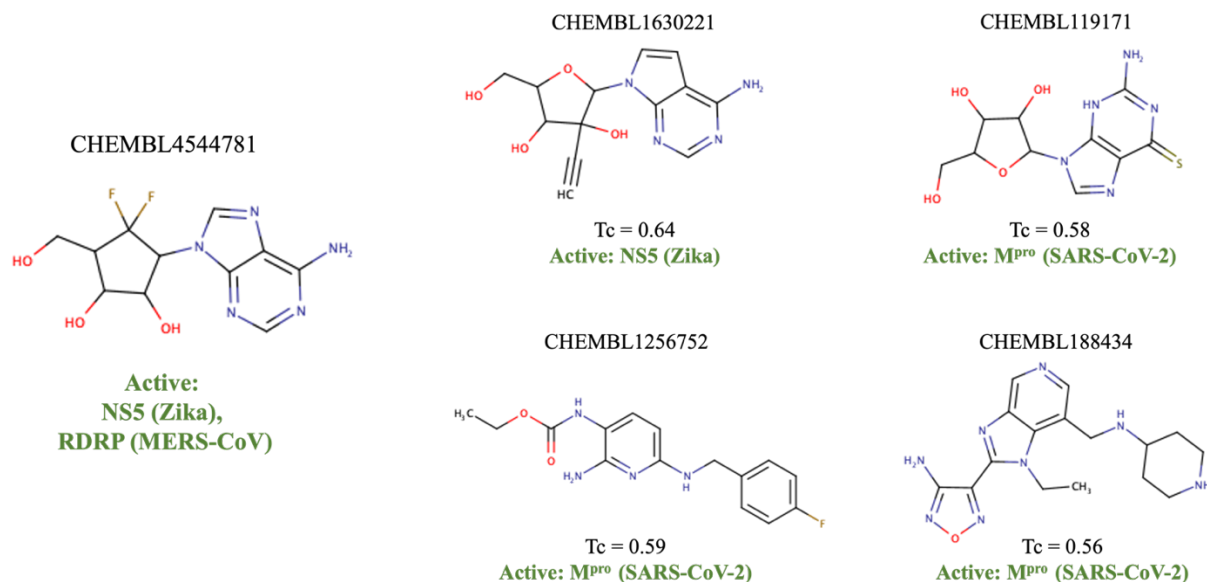

**Figure S5.** Examples of compounds that could be further tested against different viral targets of interest due to their chemical similarity to an active molecule with multiple antiviral activities.

**Table S7.** Examples of compounds of each cluster from target-based data.

---

| Cluster | Representative compound | Structure                                                                           | Active against              | Inactive against |
|---------|-------------------------|-------------------------------------------------------------------------------------|-----------------------------|------------------|
| 1       | CHEMBL4522602           | 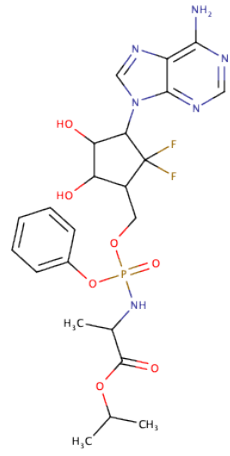 | NS5 (Zika), RDRP (MERS-CoV) |                  |

---



---

2

CHEMBL3740277

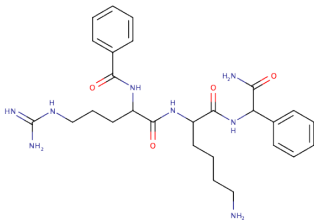

NS2B-NS3  
Protease (Dengue),  
NS2B-NS3 (West  
Nile)

---

3

CHEMBL4537775

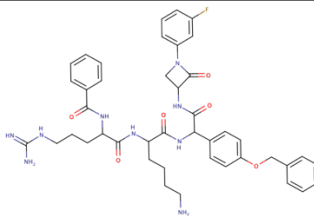

NS2B-NS3  
Protease (Dengue),  
NS2B-NS3 (West  
Nile)

---

4

CHEMBL1096979

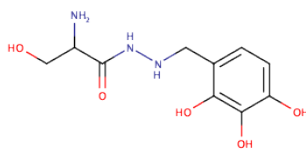

M<sup>pro</sup> (SARS-CoV-  
2)

---

5

CHEMBL105712

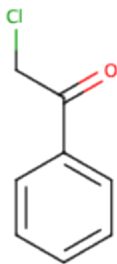

M<sup>pro</sup> (SARS-CoV-  
2)

---

6

CHEMBL4536920

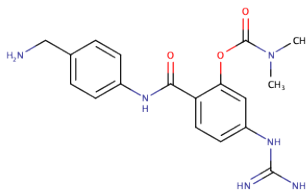

NS2B-NS3  
Protease (Dengue),  
NS2B-NS3 (West  
Nile)

---

7

CHEMBL4544781

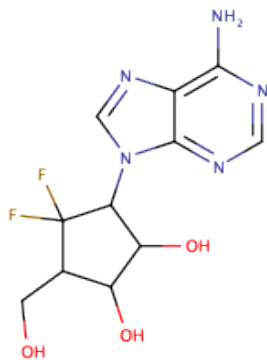

NS5 (Zika), RDRP  
(MERS-CoV)

8

CHEMBL464859

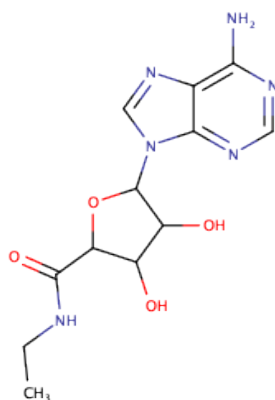

M<sup>pro</sup> (SARS-  
CoV-2)

9

CHEMBL4127413

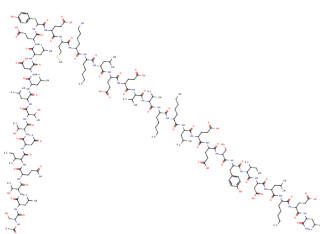

Spike protein  
(MERS-CoV)

10

CHEMBL4125813

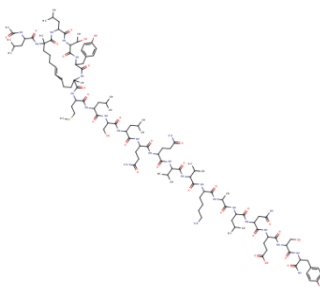

Spike protein  
(MERS-CoV)

11

CHEMBL1630963

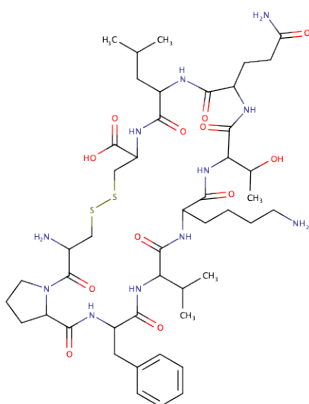

Integrin alpha-V/beta-3 (SNV)

### Concordance between the phenotypic and target-based data

**Table S8.** Compounds active in at least one phenotypic and one target-based assay

| Molecule ID   | Phenotypic Assays                                             |                    | Target-Based Assays |                   |                    |                              |
|---------------|---------------------------------------------------------------|--------------------|---------------------|-------------------|--------------------|------------------------------|
|               | Viruses (active)                                              | Viruses (inactive) | Viruses (active)    | Targets           | Viruses (inactive) | Targets                      |
| CHEMBL4437334 | Dengue Virus, West Nile Virus, Yellow Fever Virus, Zika Virus |                    | Dengue, Zika        | NS2B-NS3 Protease |                    |                              |
| CHEMBL4454990 | Dengue Virus, Zika Virus                                      |                    | Zika                | NS5               |                    |                              |
| CHEMBL1324    | Dengue Virus                                                  | SARS-CoV-2         | Dengue              | NS2B-NS3 Protease | SARS-CoV-2         | Main Protease (3CLpro, Mpro) |
| CHEMBL222813  | H7N7                                                          | SARS-CoV-2         | H7N7                | Neuraminidase     | SARS-CoV-2         | Main Protease (3CLpro, Mpro) |
| CHEMBL269277  | Dengue Virus                                                  | SARS-CoV-2         | Dengue              | NS5               | SARS-CoV-2         | Main Protease (3CLpro, Mpro) |
| CHEMBL3741713 | Dengue Virus                                                  | West Nile Virus    | Dengue              | NS2B-NS3 Protease |                    |                              |
| CHEMBL4440832 | Dengue Virus                                                  | Zika Virus         | Dengue, Zika        | NS2B-NS3 Protease |                    |                              |
| CHEMBL4462325 | Dengue Virus                                                  | Zika Virus         | Zika                | NS2B-NS3 Protease |                    |                              |
| CHEMBL4583315 | Dengue Virus                                                  | Zika Virus         | Zika                | NS2B-NS3 Protease |                    |                              |

|               |                 |                      |                      |
|---------------|-----------------|----------------------|----------------------|
| CHEMBL1370977 | Dengue Virus    | Dengue               | NS2B-NS3<br>Protease |
| CHEMBL1458891 | Dengue Virus    | Dengue               | NS2B-NS3<br>Protease |
| CHEMBL1980535 | Dengue Virus    | Dengue               | NS2B-NS3<br>Protease |
| CHEMBL267099  | HPIV-3          | Zika                 | NS5                  |
| CHEMBL3628278 | Dengue Virus    | West_Nile            | NS2B-NS3<br>Protease |
| CHEMBL3741422 | Dengue Virus    | Dengue,<br>West_Nile | NS2B-NS3<br>Protease |
| CHEMBL3818159 | H7N7            | H7N7                 | Neuraminidase        |
| CHEMBL3818654 | H7N7            | H7N7                 | Neuraminidase        |
| CHEMBL3819510 | H7N7            | H7N7                 | Neuraminidase        |
| CHEMBL4206744 | MERS-CoV        | MERS-<br>CoV         | Spike protein        |
| CHEMBL4439416 | Zika Virus      | Zika                 | NS5                  |
| CHEMBL4446364 | Zika Virus      | Zika                 | NS2B-NS3<br>Protease |
| CHEMBL4447165 | Zika Virus      | Zika                 | NS2B-NS3<br>Protease |
| CHEMBL4447800 | Dengue Virus    | Dengue               | NS2B-NS3<br>Protease |
| CHEMBL4448497 | Zika Virus      | Zika                 | NS2B-NS3<br>Protease |
| CHEMBL4449109 | Dengue Virus    | Dengue               | NS5                  |
| CHEMBL4457232 | Zika Virus      | Zika                 | NS2B-NS3<br>Protease |
| CHEMBL4522006 | Dengue Virus    | Dengue               | NS2B-NS3<br>Protease |
| CHEMBL4526128 | Dengue Virus    | Dengue               | NS5                  |
| CHEMBL4532866 | Zika Virus      | Zika                 | NS2B-NS3<br>Protease |
| CHEMBL4576745 | Dengue Virus    | Dengue,<br>West_Nile | NS2B-NS3<br>Protease |
| CHEMBL4587069 | Dengue Virus    | Dengue               | NS5                  |
| CHEMBL522355  | West Nile Virus | West_Nile            | NS2B-NS3<br>Protease |
| CHEMBL610669  | West Nile Virus | West_Nile            | not defined          |
| CHEMBL611003  | West Nile Virus | West_Nile            | not defined          |
| CHEMBL82242   | Dengue Virus    | Dengue               | NS5                  |

The chemical structures are presented below

|                      |                      |                   |                     |
|----------------------|----------------------|-------------------|---------------------|
| <b>CHEMBL4437334</b> | <b>CHEMBL4454990</b> | <b>CHEMBL1324</b> | <b>CHEMBL222813</b> |
|----------------------|----------------------|-------------------|---------------------|

|                                                                                     |                                                                                     |                                                                                      |                                                                                       |
|-------------------------------------------------------------------------------------|-------------------------------------------------------------------------------------|--------------------------------------------------------------------------------------|---------------------------------------------------------------------------------------|
| 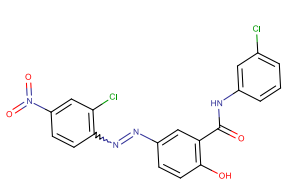   |    |    |    |
| <b>CHEMBL269277</b>                                                                 | <b>CHEMBL3741713</b>                                                                | <b>CHEMBL4440832</b>                                                                 | <b>CHEMBL4462325</b>                                                                  |
|    |    |    |    |
| <b>CHEMBL4583315</b>                                                                | <b>CHEMBL1370977</b>                                                                | <b>CHEMBL1458891</b>                                                                 | <b>CHEMBL1980535</b>                                                                  |
|   |   |   |   |
| <b>CHEMBL267099</b>                                                                 | <b>CHEMBL3628278</b>                                                                | <b>CHEMBL3741422</b>                                                                 | <b>CHEMBL3818159</b>                                                                  |
|  |  |  |  |
| <b>CHEMBL3818654</b>                                                                | <b>CHEMBL3819510</b>                                                                | <b>CHEMBL4206744</b>                                                                 | <b>CHEMBL4439416</b>                                                                  |
|  |  |  |  |
| <b>CHEMBL4446364</b>                                                                | <b>CHEMBL4447165</b>                                                                | <b>CHEMBL4447800</b>                                                                 | <b>CHEMBL4448497</b>                                                                  |
|  |  |  |  |
| <b>CHEMBL4449109</b>                                                                | <b>CHEMBL4457232</b>                                                                | <b>CHEMBL4522006</b>                                                                 | <b>CHEMBL4526128</b>                                                                  |

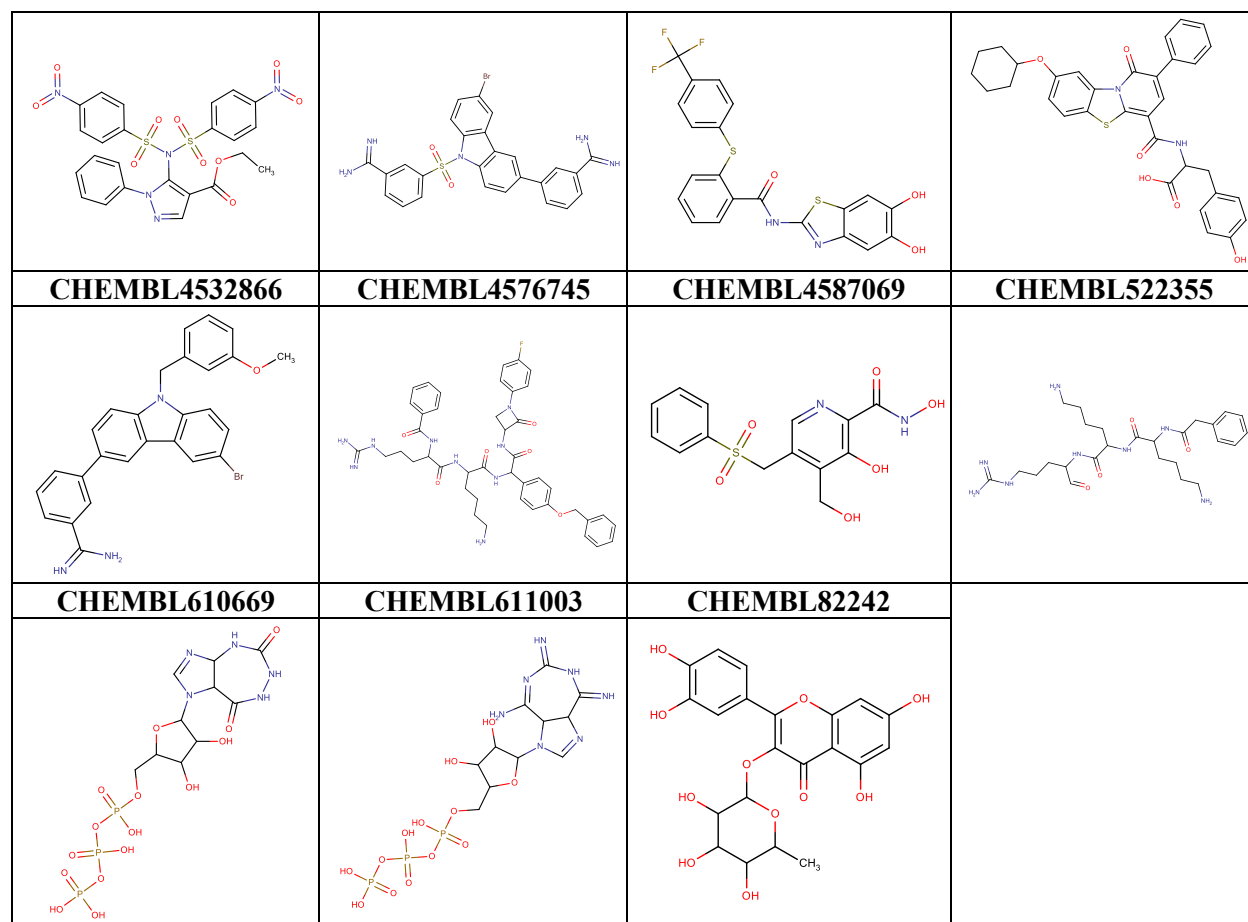

**Table S9.** Selection of compounds nominated for experimental testing as potential BSA agents

| <b>CHEMBL ID</b> | <b>Structure</b> | <b>Target active against</b> | <b>Virus(es) active against in cell-based assays</b> | <b>Suggested target-virus combination for testing</b> | <b>Reasoning for testing</b> |
|------------------|------------------|------------------------------|------------------------------------------------------|-------------------------------------------------------|------------------------------|
|                  |                  |                              |                                                      |                                                       |                              |

|               |                                                                                     |                                           |                                                                                    |                                                                                                            |                                                                                                                                              |
|---------------|-------------------------------------------------------------------------------------|-------------------------------------------|------------------------------------------------------------------------------------|------------------------------------------------------------------------------------------------------------|----------------------------------------------------------------------------------------------------------------------------------------------|
| CHEMBL4437334 | 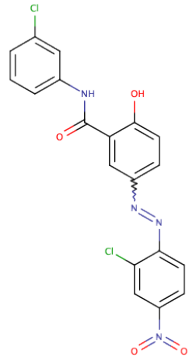   | NS2B-NS3<br>Protease<br>(Dengue,<br>Zika) | Dengue<br>Virus,<br>West Nile<br>Virus,<br>Yellow<br>Fever<br>Virus,<br>Zika Virus | NS2B-NS3<br>homologs<br>from other<br>flaviviruses<br>(West Nile,<br>Yellow Fever)                         | Cell-based<br>and target-<br>based assays<br>support the<br>hypothesis of<br>activity<br>against<br>flaviviruses by<br>targeting<br>NS2B-NS3 |
| CHEMBL4522006 |    | NS2B-NS3<br>Protease<br>(Dengue)          | Dengue<br>Virus                                                                    | NS2B-NS3<br>homologs<br>from other<br>flaviviruses<br><br>Other<br>flaviviruses in<br>cell-based<br>assays | Cell-based<br>and target-<br>based assays<br>support the<br>hypothesis of<br>activity<br>against<br>flaviviruses by<br>targeting<br>NS2B-NS3 |
| CHEMBL1324    |  | NS2B-NS3<br>Protease<br>(Dengue)          | Dengue<br>Virus                                                                    | NS2B-NS3<br>homologs<br>from other<br>flaviviruses<br><br>Other<br>flaviviruses in<br>cell-based<br>assays | Cell-based<br>and target-<br>based assays<br>support the<br>hypothesis of<br>activity<br>against<br>flaviviruses by<br>targeting<br>NS2B-NS3 |

|               |                                                                                     |                                  |                 |                                                                                                            |                                                                                                                                              |
|---------------|-------------------------------------------------------------------------------------|----------------------------------|-----------------|------------------------------------------------------------------------------------------------------------|----------------------------------------------------------------------------------------------------------------------------------------------|
| CHEMBL3741713 | 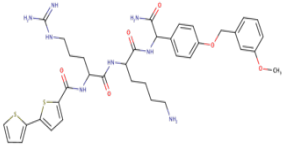   | NS2B-NS3<br>Protease<br>(Dengue) | Dengue<br>Virus | NS2B-NS3<br>homologs<br>from other<br>flaviviruses<br><br>Other<br>flaviviruses in<br>cell-based<br>assays | Cell-based<br>and target-<br>based assays<br>support the<br>hypothesis of<br>activity<br>against<br>flaviviruses by<br>targeting<br>NS2B-NS3 |
| CHEMBL4462325 |    | NS2B-NS3<br>Protease<br>(Zika)   | Dengue<br>Virus | NS2B-NS3<br>homologs<br>from other<br>flaviviruses<br><br>Other<br>flaviviruses in<br>cell-based<br>assays | Cell-based<br>and target-<br>based assays<br>support the<br>hypothesis of<br>activity<br>against<br>flaviviruses by<br>targeting<br>NS2B-NS3 |
| CHEMBL1370977 |  | NS2B-NS3<br>Protease<br>(Dengue) | Dengue<br>Virus | NS2B-NS3<br>homologs<br>from other<br>flaviviruses<br><br>Other<br>flaviviruses in<br>cell-based<br>assays | Cell-based<br>and target-<br>based assays<br>support the<br>hypothesis of<br>activity<br>against<br>flaviviruses by<br>targeting<br>NS2B-NS3 |



|               |                                                                                     |                                     |                 |                                                                                                            |                                                                                                                                              |
|---------------|-------------------------------------------------------------------------------------|-------------------------------------|-----------------|------------------------------------------------------------------------------------------------------------|----------------------------------------------------------------------------------------------------------------------------------------------|
| CHEMBL1458891 | 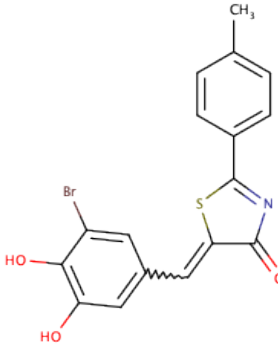   | NS2B-NS3<br>Protease<br>(Dengue)    | Dengue<br>Virus | NS2B-NS3<br>homologs<br>from other<br>flaviviruses<br><br>Other<br>flaviviruses in<br>cell-based<br>assays | Cell-based<br>and target-<br>based assays<br>support the<br>hypothesis of<br>activity<br>against<br>flaviviruses by<br>targeting<br>NS2B-NS3 |
| CHEMBL1980535 |    | NS2B-NS3<br>Protease<br>(Dengue)    | Dengue<br>Virus | NS2B-NS3<br>homologs<br>from other<br>flaviviruses<br><br>Other<br>flaviviruses in<br>cell-based<br>assays | Cell-based<br>and target-<br>based assays<br>support the<br>hypothesis of<br>activity<br>against<br>flaviviruses by<br>targeting<br>NS2B-NS3 |
| CHEMBL3628278 |  | NS2B-NS3<br>Protease<br>(West Nile) | Dengue<br>Virus | NS2B-NS3<br>homologs<br>from other<br>flaviviruses<br><br>Other<br>flaviviruses in<br>cell-based<br>assays | Cell-based<br>and target-<br>based assays<br>support the<br>hypothesis of<br>activity<br>against<br>flaviviruses by<br>targeting<br>NS2B-NS3 |

|               |                                                                                     |                                                |                 |                                                                                                            |                                                                                                                                              |
|---------------|-------------------------------------------------------------------------------------|------------------------------------------------|-----------------|------------------------------------------------------------------------------------------------------------|----------------------------------------------------------------------------------------------------------------------------------------------|
| CHEMBL3741422 | 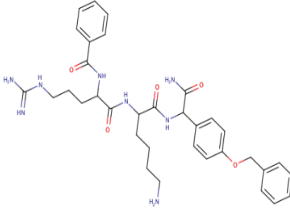   | NS2B-NS3<br>Protease<br>(Dengue,<br>West Nile) | Dengue<br>Virus | NS2B-NS3<br>homologs<br>from other<br>flaviviruses<br><br>Other<br>flaviviruses in<br>cell-based<br>assays | Cell-based<br>and target-<br>based assays<br>support the<br>hypothesis of<br>activity<br>against<br>flaviviruses by<br>targeting<br>NS2B-NS3 |
| CHEMBL4446364 |    | NS2B-NS3<br>Protease<br>(Zika)                 | Zika Virus      | NS2B-NS3<br>homologs<br>from other<br>flaviviruses<br><br>Other<br>flaviviruses in<br>cell-based<br>assays | Cell-based<br>and target-<br>based assays<br>support the<br>hypothesis of<br>activity<br>against<br>flaviviruses by<br>targeting<br>NS2B-NS3 |
| CHEMBL4447800 |  | NS2B-NS3<br>Protease<br>(Dengue)               | Dengue<br>Virus | NS2B-NS3<br>homologs<br>from other<br>flaviviruses<br><br>Other<br>flaviviruses in<br>cell-based<br>assays | Cell-based<br>and target-<br>based assays<br>support the<br>hypothesis of<br>activity<br>against<br>flaviviruses by<br>targeting<br>NS2B-NS3 |

|               |                                                                                     |                                                |                 |                                                                                                                                                                         |                                                                                                                                                              |
|---------------|-------------------------------------------------------------------------------------|------------------------------------------------|-----------------|-------------------------------------------------------------------------------------------------------------------------------------------------------------------------|--------------------------------------------------------------------------------------------------------------------------------------------------------------|
| CHEMBL4457232 | 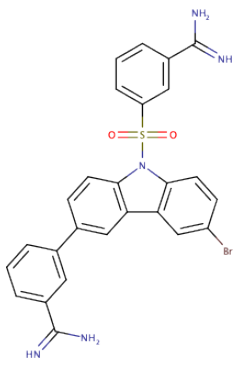   | NS2B-NS3<br>Protease<br>(Zika)                 | Zika Virus      | NS2B-NS3<br>homologs<br>from other<br>flaviviruses<br><br>Other<br>flaviviruses in<br>cell-based<br>assays                                                              | Cell-based<br>and target-<br>based assays<br>support the<br>hypothesis of<br>activity<br>against<br>flaviviruses by<br>targeting<br>NS2B-NS3                 |
| CHEMBL4576745 |    | NS2B-NS3<br>Protease<br>(Dengue,<br>West Nile) | Dengue<br>Virus | NS2B-NS3<br>homologs<br>from other<br>flaviviruses<br><br>Other<br>flaviviruses in<br>cell-based<br>assays                                                              | Cell-based<br>and target-<br>based assays<br>support the<br>hypothesis of<br>activity<br>against<br>flaviviruses by<br>targeting<br>NS2B-NS3                 |
| CHEMBL267099  |  | NS5 (Zika)                                     | HPIV-3          | Zika and<br>other<br>flaviviruses<br>(cell-based<br>assays)<br>NS5<br>homologs<br>in other<br>flaviviruses<br>(target-<br>based)<br><br>A panel of<br>HPIV-3<br>targets | Cell-<br>based<br>assays<br>against<br>Zika and<br>other<br>flaviviruses<br>to<br>confirm<br>NS5<br>inhibition<br>as a<br>possible<br>mechanism of<br>action |

|  |  |  |  |  |                                                                                                                                                                                                      |
|--|--|--|--|--|------------------------------------------------------------------------------------------------------------------------------------------------------------------------------------------------------|
|  |  |  |  |  | <p>Active against NS5 of Zika that could be tested against NS5 homologs from other flaviviruses</p> <p>Explore possible mechanism of action for HPIV-3 inhibition observed in a cell-based assay</p> |
|--|--|--|--|--|------------------------------------------------------------------------------------------------------------------------------------------------------------------------------------------------------|

|               |                                                                                     |              |                          |                                                                                     |                                                                                                             |
|---------------|-------------------------------------------------------------------------------------|--------------|--------------------------|-------------------------------------------------------------------------------------|-------------------------------------------------------------------------------------------------------------|
| CHEMBL4454990 | 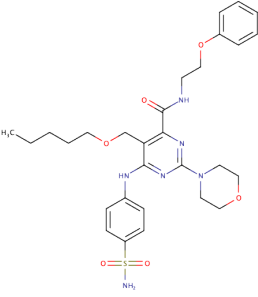   | NS5 (Zika)   | Dengue Virus, Zika Virus | NS5 homologs from other flaviviruses<br><br>Other flaviviruses in cell-based assays | Cell-based and target-based assays support the hypothesis of activity against flaviviruses by targeting NS5 |
| CHEMBL4439416 |    | NS5 (Zika)   | Zika Virus               | NS5 homologs from other flaviviruses<br><br>Other flaviviruses in cell-based assays | Cell-based and target-based assays support the hypothesis of activity against flaviviruses by targeting NS5 |
| CHEMBL82242   |  | NS5 (Dengue) | Dengue Virus             | NS5 homologs from other flaviviruses<br><br>Other flaviviruses in cell-based assays | Cell-based and target-based assays support the hypothesis of activity against flaviviruses by targeting NS5 |
| CHEMBL269277  |  | NS5 (Dengue) | Dengue Virus             | NS5 homologs from other flaviviruses<br><br>Other flaviviruses in cell-based assays | Cell-based and target-based assays support the hypothesis of activity against flaviviruses by targeting NS5 |

|               |  |                 |                 |                                                                                                       |                                                                                                                                      |
|---------------|--|-----------------|-----------------|-------------------------------------------------------------------------------------------------------|--------------------------------------------------------------------------------------------------------------------------------------|
| CHEMBL4449109 |  | NS5<br>(Dengue) | Dengue<br>Virus | NS5<br>homologs<br>from other<br>flaviviruses<br><br>Other<br>flaviviruses in<br>cell-based<br>assays | Cell-based<br>and target-<br>based assays<br>support the<br>hypothesis of<br>activity<br>against<br>flaviviruses by<br>targeting NS5 |
| CHEMBL4526128 |  | NS5<br>(Dengue) | Dengue<br>Virus | NS5<br>homologs<br>from other<br>flaviviruses<br><br>Other<br>flaviviruses in<br>cell-based<br>assays | Cell-based<br>and target-<br>based assays<br>support the<br>hypothesis of<br>activity<br>against<br>flaviviruses by<br>targeting NS5 |
| CHEMBL4587069 |  | NS5<br>(Dengue) | Dengue<br>Virus | NS5<br>homologs<br>from other<br>flaviviruses<br><br>Other<br>flaviviruses in<br>cell-based<br>assays | Cell-based<br>and target-<br>based assays<br>support the<br>hypothesis of<br>activity<br>against<br>flaviviruses by<br>targeting NS5 |

**Table S10.** Compounds active in at least one phenotypic assay and inactive in a target-based assay.

| ChEMBL ID            | SMILES                                                                           |
|----------------------|----------------------------------------------------------------------------------|
| <b>CHEMBL941</b>     | <chem>CN1CCN(Cc2ccc(cc2)C(=O)Nc2cc(Nc3[n]c(cc[n]3)-c3c[n]ccc3)c(C)cc2)CC1</chem> |
| <b>CHEMBL29197</b>   | <chem>COc1cc2c(Nc3cc(Br)ccc3)[n]c[n]e2cc1OC</chem>                               |
| <b>CHEMBL97771</b>   | <chem>COc1cc2[n]c[n]c(Nc3ccc(cc3)Oc3ccccc3)c2cc1OC</chem>                        |
| <b>CHEMBL483847</b>  | <chem>NC(=O)c1cc(ccc1)-c1cc(Nc2ccc(cc2)OC(F)(F)F)[n]c[n]1</chem>                 |
| <b>CHEMBL296407</b>  | <chem>NC(=O)C(=Cc1cc(O)c(O)cc1)C#N</chem>                                        |
| <b>CHEMBL249089</b>  | <chem>O=S(=O)(c1cccc2c(I)cccc12)N1CCCNCC1</chem>                                 |
| <b>CHEMBL1797882</b> | <chem>CC(C)(C)NC(=O)C(=O)C=Cc1cc(OC)c(cc1)OC</chem>                              |
| <b>CHEMBL304087</b>  | <chem>COc1cc(ccc1-c1c[n]co1)NC(=O)Nc1cc(CNC(=O)OC2COCC2)ccc1</chem>              |

|                      |                                                                                                                  |
|----------------------|------------------------------------------------------------------------------------------------------------------|
| <b>CHEMBL6741</b>    | <chem>CC1(C)N=C(N)N=C(N)N1c1ccc(Br)cc1</chem>                                                                    |
| <b>CHEMBL7130</b>    | <chem>CC1(C)N=C(N)N=C(N)N1c1cccc(Cl)c1</chem>                                                                    |
| <b>CHEMBL7301</b>    | <chem>CC1CCCC(C)(C)C=1C=CC(C)=CC=CC(C)=CC(=O)Nc1ccc(O)cc1</chem>                                                 |
| <b>CHEMBL7568</b>    | <chem>COc1cc2c(NC(C)CCCN(CC)CC)c3ccc(Cl)cc3[n]e2cc1</chem>                                                       |
| <b>CHEMBL3410450</b> | <chem>Cc1c[n]2[n]c(cc2[n]c1N1CC(N)CC1)C1CCCCN1C(=O)c1cc(Cl)ccc1NS(C)(=O)=O</chem>                                |
| <b>CHEMBL408963</b>  | <chem>Cc1ccc(CCCO)c(c1)NCc1cc2c(cc1)[n]c(NCCCN1CCOCC1)[n]2Cc1[n]c(C)ccc1O</chem>                                 |
| <b>CHEMBL513181</b>  | <chem>NC1C=CN(C2OC(CO)([N-][N+]#N)C(O)C2O)C(=O)N=1</chem>                                                        |
| <b>CHEMBL3417243</b> | <chem>NC1C=CN(C2OC(CO)(CCl)C(O)C2F)C(=O)N=1</chem>                                                               |
| <b>CHEMBL393857</b>  | <chem>NC1C=CN(C2OC(CO)([N-][N+]#N)C(O)C2O)C(=O)N=1</chem>                                                        |
| <b>CHEMBL682</b>     | <chem>CCN(Cc1cc(ccc1O)Nc1cc[n]e2cc(Cl)ccc21)CC</chem>                                                            |
| <b>CHEMBL3781415</b> | <chem>Nc1[n]c(CC2CC2)c(c[n]1)-c1cc[n]c(Nc2cc[n]cc2)[n]1</chem>                                                   |
| <b>CHEMBL1205</b>    | <chem>Cc1c(cccc1O)C(=O)NC(CSc1ccccc1)C(O)CN1CC2CCCCC2CC1C(=O)NC(C)(C)C</chem>                                    |
| <b>CHEMBL3407547</b> | <chem>Cc1c2c([s]c1-c1[n]cco1)N(CC(OC1CCOCC1)c1ccccc1OC)C(=O)N(C2=O)C(C)C(O)=O</chem>                             |
| <b>CHEMBL137648</b>  | <chem>O=C1N(Cc2cc(F)ccc2)CN(c2ccccc2)C21CCN(CCCC(=O)c1ccc(F)cc1)CC2</chem>                                       |
| <b>CHEMBL119</b>     | <chem>Cc1c(CNc2cc(OC)c(OC)c(e2)OC)ccc2[n]c(N)[n]c(N)c12</chem>                                                   |
| <b>CHEMBL38434</b>   | <chem>Cc1c([n]e2ccc(F)cc2c1C(O)=O)-c1ccc(cc1)-c1ccccc1F</chem>                                                   |
| <b>CHEMBL1078</b>    | <chem>CC(C)[n]1e2ccccc2c(c1C=CC(O)CC(O)CC(O)=O)-c1ccc(F)cc1</chem>                                               |
| <b>CHEMBL54440</b>   | <chem>CCC(C)C(=O)OC1CCC=C2C=CC(C)C(CCC3CC(O)CC(=O)O3)C21</chem>                                                  |
| <b>CHEMBL503</b>     | <chem>CCC(C)C(=O)OC1CC(C)C=C2C=CC(C)C(CCC3CC(O)CC(=O)O3)C21</chem>                                               |
| <b>CHEMBL1064</b>    | <chem>CCC(C)C(=O)OC1CC(C)C=C2C=CC(C)C(CCC3CC(O)CC(=O)O3)C21</chem>                                               |
| <b>CHEMBL4533598</b> | <chem>O=C(Nc1ccc[s]1)c1ccccc1Se1ccc(cc1)N(=O)=O</chem>                                                           |
| <b>CHEMBL4457482</b> | <chem>CCCCCCCCCCCCCCCC[N+](CO)(CO)CC</chem>                                                                      |
| <b>CHEMBL553</b>     | <chem>COCCOc1cc2[n]c[n]c(Nc3cc(ccc3)C#C)c2cc1OCCOC</chem>                                                        |
| <b>CHEMBL67</b>      | <chem>COc1c(cc(cc1OC)C=Cc1cc(O)c(cc1)OC)OC</chem>                                                                |
| <b>CHEMBL41</b>      | <chem>CNCCC(Oc1ccc(cc1)C(F)F)c1ccccc1</chem>                                                                     |
| <b>CHEMBL1263</b>    | <chem>Oc1ccc(cc1CO)C(O)CNCCCCCOCCCCc1ccccc1</chem>                                                               |
| <b>CHEMBL251254</b>  | <chem>OCC1OC(OC2C(=O)c3c(cc(O)cc3O)OC=2c2cc(O)c(O)cc2)C(O)C(O)C1O</chem>                                         |
| <b>CHEMBL226335</b>  | <chem>CC1OC(OCC2OC(OC3C(=O)c4c(cc(O)cc4O)OC=3c3cc(O)c(O)cc3)C(O)C(O)C2O)C(O)C1O</chem>                           |
| <b>CHEMBL289277</b>  | <chem>Cc1cc(O)c2c(c1)C(=O)c1cc(O)cc(O)c1C2=O</chem>                                                              |
| <b>CHEMBL4470866</b> | <chem>C[n]1e2ccc(Br)cc2e2ccc(ccc12)-c1cc(ccc1)C(N)=N</chem>                                                      |
| <b>CHEMBL4444928</b> | <chem>NC(=N)c1cc(C[n]2c3ccc(Br)cc3c3cc(Br)ccc23)ccc1</chem>                                                      |
| <b>CHEMBL4437316</b> | <chem>NC(=N)c1cc(ccc1)S(=O)(=O)[n]1c2ccc(Br)cc2c2cc(Br)ccc12</chem>                                              |
| <b>CHEMBL4544053</b> | <chem>NC(=N)c1cc(ccc1)-c1cc2cc(ccc2cc1)-c1cc(ccc1)C(N)=N</chem>                                                  |
| <b>CHEMBL430893</b>  | <chem>COc1ccc(cc1OC1CCCC1)C1CC(=O)NC1</chem>                                                                     |
| <b>CHEMBL325795</b>  | <chem>COc1ccc(cc1OC1CCCC1)C1CC(=O)NC1</chem>                                                                     |
| <b>CHEMBL113142</b>  | <chem>Nc1[n]c(NCCc2ccc(O)cc2)[n]e2[n]c([n][n]21)-c1cccc1</chem>                                                  |
| <b>CHEMBL63</b>      | <chem>COc1ccc(cc1OC1CCCC1)C1CC(=O)NC1</chem>                                                                     |
| <b>CHEMBL240624</b>  | <chem>COCCOc1ccc(cc1)N1CCN(CC[n]2[n]cc3c4[n]c([n][n]4c(N)[n]c23)-c2ccco2)CC1</chem>                              |
| <b>CHEMBL16901</b>   | <chem>C=CCc1cc(-c2cc(CC=C)c(O)cc2)c(O)cc1</chem>                                                                 |
| <b>CHEMBL2146722</b> | <chem>CC1CCN(CC1)C(c1ccc(F)cc1)c1ccc(cc1)-c1ccc(cc1)C(F)F)C(C)C(O)=O</chem>                                      |
| <b>CHEMBL1491</b>    | <chem>CC1NC(=COCCN)C(C(C=1C(=O)OC)c1ccccc1Cl)C(=O)OCC</chem>                                                     |
| <b>CHEMBL3039369</b> | <chem>COC1CC(OC(C)C1O)OC1C(C)C=CC=C2COC3C(=NO)C(C)=CC(C(=O)OC4CC(CC=C1C)OC1(C4)CCC(C)C(O)1)C1CCCC1)C23O</chem>   |
| <b>CHEMBL430226</b>  | <chem>CC(=O)ON=C1C(Nc2ccccc12)=C1c2ccc(Br)cc2NC1=O</chem>                                                        |
| <b>CHEMBL4518162</b> | <chem>COc1c(cc(cc1OC)C=Cc1cc(NC(=O)C(CO)NC(=O)C(CCCNC(N)=N)NC(=O)C(CCCNC(N)=N)N(C(=O)c2ccccc2)c(cc1)OC)OC</chem> |

**Table S11.** Compounds inactive in a phenotypic assay and active in at least one target-based assay

| ChEMBL ID     | SMILES                                                                                                         |
|---------------|----------------------------------------------------------------------------------------------------------------|
| CHEMBL324842  | <chem>OC(=O)C(Cc1ccc(O)c(O)c1)OC(=O)C=Cc1ccc(O)c(O)c1</chem>                                                   |
| CHEMBL288114  | <chem>OC(=O)c1cc(O)c(O)c(O)c1</chem>                                                                           |
| CHEMBL4288319 | <chem>O=C(OC1=CS(=O)(=O)Nc2ccc(cc12)Oc1cccc1Br)c1ccc(F)c(F)c1</chem>                                           |
| CHEMBL2440341 | <chem>CCCCC(NC(=O)C(CCCCN)NC(=O)C(CCCNC(N)=N)NC(=O)c1ccc(cc1)C=C(C#N)C(=O)NC1CC1)C(N)=O</chem>                 |
| CHEMBL4460508 | <chem>Cc1ccc(cc1)S(=O)(=O)N1CCCC1C(=O)Nc1[n]c2cc(O)c(O)cc2[s]1</chem>                                          |
| CHEMBL4560058 | <chem>Cc1ccc(cc1)S(=O)(=O)N1CCCC1C(=O)Nc1[n]c2cc(O)c(O)cc2[s]1</chem>                                          |
| CHEMBL4437288 | <chem>C[n]1c2ccc(cc2c2cc(ccc12)-c1cc(ccc1)C(N)=N)-c1cc(ccc1)C#N</chem>                                         |
| CHEMBL4518903 | <chem>NC(=N)c1cc(ccc1)S(=O)(=O)[n]1c2ccc(cc2c2cc(ccc12)-c1cc(ccc1)C#N)-c1cc(ccc1)C#N</chem>                    |
| CHEMBL4548788 | <chem>COc1cc(ccc1)S(=O)(=O)[n]1c2ccc(Br)cc2c2cc(ccc12)-c1cc(ccc1)C(N)=N</chem>                                 |
| CHEMBL4591196 | <chem>OCC1Cc2ccccc2N1C(=O)OCc1ccccc1</chem>                                                                    |
| CHEMBL1214186 | <chem>Ne1[n]c[n]c2c1[n]c[n]2C1OC(CC(N)CCC(N)C(O)=O)C(O)C1O</chem>                                              |
| CHEMBL221722  | <chem>NC(=O)C1=NC(F)=CNC1=O</chem>                                                                             |
| CHEMBL55400   | <chem>Ne1cc2[n]c3cc(N)ccc3cc2cc1</chem>                                                                        |
| CHEMBL4080284 | <chem>O=C1C2CCCN2C(c2ccc(cc2)N(=O)=O)N1c1ccc(cc1)N(=O)=O</chem>                                                |
| CHEMBL4436496 | <chem>Ne1cc(N)c(cc1N=Nc1ccc(cc1)S(=O)(=O)Nc1[n]cc[s]1)N=Nc1ccc(cc1)S(=O)(=O)Nc1[n]cc[s]1</chem>                |
| CHEMBL2440353 | <chem>CCCCC(NC(=O)C(CCCCN)NC(=O)C(CCCNC(N)=N)NC(=O)c1ccc(cc1)C=C1SC(=O)N(C2CC2)C1=O)C(N)=O</chem>              |
| CHEMBL4568823 | <chem>COc1cc(ccc1)S(=O)(=O)[n]1c2ccc(cc2c2cc(ccc12)-c1cc(ccc1)C(N)=N)-c1cc(ccc1)C(N)=N</chem>                  |
| CHEMBL4558642 | <chem>COc1cc(ccc1)S(=O)(=O)[n]1c2ccc(cc2c2cc(ccc12)-c1cc(ccc1)C#N)-c1cc(ccc1)C(N)=N</chem>                     |
| CHEMBL485818  | <chem>OC(=O)C1OC(OC2C=C3OC(=CC(O)=C3C(=O)C=2O)c2ccccc2)C(O)C(O)C1O</chem>                                      |
| CHEMBL8260    | <chem>OC1C=C2OC(=CC(O)=C2C(=O)C=1O)c1ccccc1</chem>                                                             |
| CHEMBL660     | <chem>NC12CC3CC(C1)CC(C2)C3</chem>                                                                             |
| CHEMBL3989759 | <chem>Cc1c(F)cc2[n]c3c4=CC5=C(COC(=O)C5(O)CC)C(=O)N4Cc3c3C(N)CCc1c23</chem>                                    |
| CHEMBL4297188 | <chem>Ne1[n]cccc1-c1[n]c2ccc([n]c2[n]1-c1ccc(cc1)C1(N)CCC1)-c1ccccc1</chem>                                    |
| CHEMBL69863   | <chem>Oc1ccc(cc1O)C=Cc1cc(O)cc(O)c1</chem>                                                                     |
| CHEMBL1555751 | <chem>CN(C)C1C2C(O)C3C(=C)c4cccc(O)c4C(=O)C3=C(O)C2(O)C(=O)C(C(N)=O)C1=O</chem>                                |
| CHEMBL4303331 | <chem>CC1OC(OC2C(=O)c3c(cc(O)cc3O)OC=2c2cc(O)c(O)c(O)c2)C(O)C(O)C1O</chem>                                     |
| CHEMBL1201073 | <chem>OC(=O)C(S)C(S)C(O)=O</chem>                                                                              |
| CHEMBL4303376 | <chem>CN(c1ccccc1C)C(=O)c1cc(c(cc1)S(=O)c1[n]cc[s]1)N(=O)=O</chem>                                             |
| CHEMBL391997  | <chem>Oc1cc2CN(CCCc2cc1O)C(=S)NCCc1ccc(Cl)cc1</chem>                                                           |
| CHEMBL4303445 | <chem>COC(=O)C1=C(NC(=S)N1C(CC)c1cc(F)c(F)cc1)c1cc[n]o1</chem>                                                 |
| CHEMBL94841   | <chem>CCN1C(=O)NN=C1c1ccc(Cl)cc1</chem>                                                                        |
| CHEMBL964     | <chem>CCN(CC)C(=S)SSC(=S)N(CC)CC</chem>                                                                        |
| CHEMBL1414870 | <chem>NC(=S)NNe1ccc(cc1)N=NC(N)=N</chem>                                                                       |
| CHEMBL3769507 | <chem>CCN1C=C(c2[s]c(cc2C1=O)C(=N)NC1CCS(=O)(=O)CC1)c1cc(ccc1)C(F)(F)F</chem>                                  |
| CHEMBL178459  | <chem>CC1C(=S)SSC=1c1c[n]cc[n]1</chem>                                                                         |
| CHEMBL485549  | <chem>Oc1c(ccc1N(=O)=O)N(=O)=O)C(=O)NN=Cc1ccc(o1)N(=O)=O</chem>                                                |
| CHEMBL4303154 | <chem>COC(=O)C1=COC(OC2OC(CO)C(O)C(O)C2O)C(=CC)C1CC(=O)OCCc1cc(O)c(O)cc1</chem>                                |
| CHEMBL4303622 | <chem>Ne1[n]c(N)c(cc1SC#N)SC#N</chem>                                                                          |
| CHEMBL353335  | <chem>Oc1c(Cl)c2CCNCC(c2cc1O)c1ccccc1</chem>                                                                   |
| CHEMBL2107818 | <chem>CC1OC(CC(N)C1O)OC1CC(O)(Cc2c(O)c3C(=O)c4cccc(OC)c4C(=O)c3c(O)c21)C(CO)=NNC(=O)CCCCCN1C(=O)C=CC1=O</chem> |
| CHEMBL1256915 | <chem>CN1CCC2(C)C1N(C)c1ccc(O)cc21</chem>                                                                      |



**CHEMBL286738** NS(=O)(=O)Oc1ccc2C3CCCCC=3C(=O)Oe2c1  
**CHEMBL1256752** CCOC(=O)Nc1ccc(NCc2ccc(F)cc2)[n]c1N  
**CHEMBL1380480** COc1cc(ccc1O)C(=S)N1CCOCC1  
**CHEMBL1516068** Clc1ccc(cc1)C(OCCN1CCCCC1)c1ccccc1  
**CHEMBL66953** OC1C=C2C=CC=C(O)C(O)=C2C(=O)C=1O  
**CHEMBL224120** C[S+](CC1OC(C(O)C1O)[n]1c[n]e2c1[n]c[n]e2N)CCC(N)C(O)=O  
**CHEMBL1213887** CC1NC(=S)NC(C=1C(=O)OCC)c1cc(O)ccc1  
**CHEMBL1356238** O[n+]1ccccc1S  
**CHEMBL3392011** OC(Cc1cc(O)c(O)cc1)C(O)=O  
**CHEMBL4303595** O=C1C=Cc2cc(Br)ccc2C1=O  
**CHEMBL1271764** CN1CCN(CC1)C1=C(Cl)C(=O)N(c2ccc(Cl)c(Cl)c2)C1=O  
**CHEMBL297453** Oc1cc2OC(C(Cc2c(O)c1)OC(=O)c1cc(O)c(O)c(O)c1)c1cc(O)c(O)c(O)c1  
**CHEMBL421** OC(=O)c1cc(ccc1O)N=Nc1ccc(cc1)S(=O)(=O)Nc1cccc[n]1  
**CHEMBL60718** Cc1ccc(cc1)S(=O)(=O)NC(Cc1ccccc1)C(=O)CC1  
**CHEMBL3348861** OC1C(Oc2cc(O)cc(O)c2C1=O)c1cc(O)c(O)c(O)c1  
**CHEMBL571700** CN(C)C(=S)SC(=S)N(C)C  
**CHEMBL120563** CN(C)C(=S)SSC(=S)N(C)C  
**CHEMBL1092926** Fe1cc(cc(F)c1CN1CCOCC1)-c1cccc2[n]cc([n]c21)-c1c[n]([n]c1)C1CCNCC1  
**CHEMBL1230122** CN1C(=O)C(=Cc2c[n]c(NC3CCOCC3)[n]c12)Oc1ccc(F)cc1F  
**CHEMBL3963349** CC(C)C(NC(=O)C(CCC(=O)OC)NC(=O)C(CC(=O)OC)NC(=O)OCc1ccccc1)C(=O)NC(CC(=O)OC)C(=O)CF  
**CHEMBL3797437** Oc1cc2OCOc2cc1C(c1ccc(cc1)C(F)(F)F)N1CCOCC1  
**CHEMBL596674** CC(C)N(Cc1ccccc1)CCC(=O)c1cc2ccccc2cc1  
**CHEMBL1725120** Cc1cc(c(C)cc1)N1Sc2cc(F)ccc2C1=O  
**CHEMBL1382627** Nc1ccc(cc1)S(=O)(=O)Nc1[n]ccc[n]1  
**CHEMBL1408862** OCC(Br)(CO)N(=O)=O  
**CHEMBL1271993** O=C1C(=C(Cl)C(=O)N1c1ccc(Cl)c(Cl)c1)N1CCOCC1  
**CHEMBL1161936** OC(=O)c1c[n]c(cc1)SSc1ccc(c[n]1)C(O)=O  
**CHEMBL1374426** CCC(=O)OCN1C(=O)C=CC1=O  
**CHEMBL3545157** O=C1SN(c2cccc3ccccc32)C(=O)N1Cc1ccccc1  
**CHEMBL198997** Cc1[s]c([n]c1OCCOCCCC)-c1ccc(C(O)=O)c(F)c1  
**CHEMBL3989514** CCc1c2cc(ccc2[n]c2C3=CC4=C(COC(=O)C4(O)CC)C(=O)N3Cc21)OC(=O)N1CCC(CC1)N1C  
**CHEMBL12208** CCCC1  
**CHEMBL4303503** CC1=CC(=O)Oe2cc(O)ccc21  
**CHEMBL1530581** CC1(C)CCC(O)C23COC(O)(CC12)C12C3CCC(C1O)C(=C)C2=O  
**CHEMBL1201236** C1COCCN1Sc1[n]c2ccccc2[s]1  
**CHEMBL536282** CC(Cc1cc(O)c(O)cc1)(NN)C(O)=O  
**CHEMBL270299** NCC1=CNC(=S)N1C1Cc2cc(F)cc(F)c2CC1  
**CHEMBL403183** CC(C)(C)c1ccc(cc1)S(=O)(=O)C=CC#N  
**CHEMBL17329** Cc1ccc(cc1)S(=O)(=O)C=CC#N  
**CHEMBL2106486** COC(=O)C=Cc1cc(O)ccc1O  
**CHEMBL510038** CON=C(c1c[s]c(N)[n]1)C(=O)NC1C2SCC(CSC(=O)c3ccco3)=C(C(O)=O)N2C1=O  
**CHEMBL28** Nc1[n][n]c(Sc2[n]cc([s]2)N(=O)=O)[s]1  
**CHEMBL28** Oc1cc(O)cc2OC(=CC(=O)c12)c1ccc(O)cc1

**CHEMBL1671898** Cc1c[n]2c([n]1)c(cc(Cl)c2N)C(=O)NCC1CCN(CC(C)C)CC1  
**CHEMBL1200712** Cc1cc(ccc1NN=C1C=Cc2c(C1=O)c(N)c(cc2S(O)(=O)=O)S(O)(=O)=O)-c1cc(C)c(cc1)NN=C1C=Cc2c(C1=O)c(N)c(cc2S(O)(=O)=O)S(O)(=O)=O  
**CHEMBL680** NC(c1cccc1)C(=O)NC1C2SCC(Cl)=C(C(O)=O)N2C1=O  
**CHEMBL3747259** OC(=O)C(Cc1cc(O)c(O)cc1)OC(=O)C=Cc1ccc(O)c2OC(C(c12)C(=O)OC(Cc1cc(O)c(O)cc1)C(O)=O)c1cc(O)c(O)cc1  
**CHEMBL51628** Oc1cc2OC(=O)C=Cc2cc1  
**CHEMBL596380** O=N(=O)C=Cc1cc2OCOc2cc1  
**CHEMBL961** CCN(CC)C(S)=S  
**CHEMBL1616** CN1CCc2cccc3c2C1Cc1ccc(O)c(O)c1-3  
**CHEMBL582355** CCOc1cc2c(cc1)[n]c1cc(N)ccc1c2N  
**CHEMBL243652** O=C1C(CC(=O)Nc2ccc(Br)cc2)Sc2[n]c[n][n]12  
**CHEMBL481** CCc1c2cc(ccc2[n]c2C3=CC4=C(COC(=O)C4(O)CC)C(=O)N3Cc21)OC(=O)N1CCC(CC1)N1CCCCC1  
**CHEMBL107217** CCN(CC)C(S)=S  
**CHEMBL1015** Cc1cc(ccc1NN=C1C=Cc2c(C1=O)c(N)c(cc2S(O)(=O)=O)S(O)(=O)=O)-c1cc(C)c(cc1)NN=C1C=Cc2c(C1=O)c(N)c(cc2S(O)(=O)=O)S(O)(=O)=O  
**CHEMBL1449651** SC(=S)N1CCCC1  
**CHEMBL2359093** OC(=O)c1c(C2c3cc(I)c(O)c(I)c3OC3C=2C=C(I)C(=O)C=3I)c(Cl)c(Cl)c(Cl)c1Cl  
**CHEMBL444186** CC(CN1CC(=O)NC(=O)C1)N1CC(=O)NC(=O)C1  
**CHEMBL1923234** CC(NC(=O)C(=Cc1cccc(Br)[n]1)C#N)c1cccc1  
**CHEMBL244948** Oc1ccc2C=CC(=O)Oe2c1O  
**CHEMBL1886408** CCOC(=O)Cc1ccc(cc1)-c1cccc1  
**CHEMBL9116** CC(=O)N(OC(=O)NC)C(=O)NC  
**CHEMBL487253** C[n]1c2ccc(cc2[n]c1CCCC(O)=O)N(CCC1)CCC1  
**CHEMBL1683636** Cc1[n](Cc2ccccc2)cc[nH+]1CCCCCCCCCCCCC  
**CHEMBL1628564** CN(CC(O)=O)CCOc1ccc(cc1C(C)(C)C)-c1cc2OCOc2cc1  
**CHEMBL1964991** NC(=N)c1ccc(cc1)-c1ccc(o1)-c1ccc(cc1)C(N)=N  
**CHEMBL2354521** CC(NCCC(=O)c1cc(ccc1)OC)C(O)c1cccc1  
**CHEMBL1917204** Cc1ccc(cc1)N1SC(=O)N(Cc2ccc(F)cc2)C1=O  
**CHEMBL1422849** CCN1CCN(CC1)C(c1ccc2ccc[n]e2c1O)c1ccc(cc1)C(F)(F)F  
**CHEMBL128251** OC(=O)CCCCCCCCCCCCC1ccc(l)cc1  
**CHEMBL1026** Oc1c(Cl)c2CCNCC(c2cc1O)c1ccc(O)cc1  
**CHEMBL188434** CC[n]1c2e(c[n]cc2CNC2CCNCC2)[n]c1-c1[n]o[n]c1N  
**CHEMBL2093109** COc1c(cc(CC2NCCc3cc(O)c(O)cc32)cc1OC)OC  
**CHEMBL1517651** CN1CCc2cc3OCOc3cc2C1O  
**CHEMBL286120** C=CCN1CC(c2cc(O)c(O)cc2CC1)c1cccc1  
**CHEMBL451197** NCCc1cc(O)c(O)cc1O  
**CHEMBL1370630** COc1ccc(cc1)C1CC(=NN1c1ccc(cc1)S(N)(=O)=O)c1cccc1  
**CHEMBL4303312** Oc1c(I)cc(I)c(O)c1I  
**CHEMBL2204502** Cc1cc(C(N)=O)c(cc1C(=O)NC1CC2CCC(C1)N2c1ccc(e[n]1)C(=O)C1CC1)NC(C)CC  
**CHEMBL472940** Oc1ccc2ccccc2c1SSc1c2ccccc2ccc1O  
**CHEMBL3894518** CC[n]1[n]c([n]c1-c1c[n]c(N)c([n]1)-c1[n][n]c(o1)C(C)(C)C)C1CCN(CC1)C(=O)CCO  
**CHEMBL477197** Oc1cc2C3c4ccc(O)c(O)c4OCC3(O)Cc2cc1O  
**CHEMBL1738731** C[n]1cc(c[n]1)-c1ccc2[n]cc(Cc3ccc4[n]cccc4c3)[n]2[n]1

**CHEMBL3392049** ON1C=CC=CC1=S  
**CHEMBL329522** Oc1ccc(C(=O)c2cc(O)c(O)c(O)c2)c(O)c1O  
**CHEMBL959** CC(N)C12CC3CC(C1)CC(C2)C3  
**CHEMBL505670** O[n+]1cccc1Sc1ccc(c2[n]o[n]c12)N(=O)=O  
**CHEMBL2368547** OC(=O)c1cc(O)c2c(c1)c(-  
c1c3cc(cc(O)c3c(O)c3c1cccc3OC1OC(CO)C(O)C(O)C1O)C(O)=O)c1cccc(OC3OC(CO)C(O)C(O)C3O)c1c2O  
**CHEMBL1553873** CN(C)c1cc(OC)c(O)c(CN(C)CCc2ccc(cc2)N(=O)=O)c1  
**CHEMBL284861** CN1SC(=O)N(Cc2ccccc2)C1=O  
**CHEMBL87708** CN(CCCN1c2ccccc2CCc2ccccc12)CC(=O)c1ccc(Cl)cc1  
**CHEMBL4303361** Oc1c(O)cc(CNC(=S)C=Cc2cc(Br)c(O)c(O)c2)cc1O  
**CHEMBL1474701** O=C1C=CC(=O)C2C3c4ccccc4C(C1=2)c1ccccc13  
**CHEMBL111654** S=C1Nc2ccccc2S1  
**CHEMBL1096** CC(C)c1cc2c(cc1)Oc1[n]c(N)c(cc1C2=O)C(O)=O  
**CHEMBL1790039** CCN(CC)c1ccc(cc1)[C+](c1ccc(cc1)N(CC)CC)c1ccccc1  
**CHEMBL585** Nc1[n]c(N)[n]c2[n]c(N)c([n]c12)-c1ccccc1  
**CHEMBL105712** O=C(CCl)c1ccccc1  
**CHEMBL291143** NCC1OC(Cc2c1ccc(O)c2O)C12CC3CC(C1)CC(C2)C3  
**CHEMBL118109** COc1cc(cc(CSc2[n]c3ccccc3[s]2)c1O)C=C(C#N)C(N)=O  
**CHEMBL1610810** Cc1cc(ccc1N)-c1[n]c2[n]cccc2o1  
**CHEMBL388676** O=C1C2CC=CCC2C(=O)N1SC(Cl)(Cl)Cl  
**CHEMBL1188627** CN=C1N=C(c2ccccc2)N(S1)c1ccccc1  
**CHEMBL508280** O=N(=O)c1c[n]c(SC2=NNC(=O)N2c2cc3OCCOc3cc2)[s]1  
**CHEMBL2106153** CN1CC2CC1CN2c1cc2c(cc1F)C(=O)C(=CN2C1CC1)C(O)=O  
**CHEMBL331743** CCOC(=S)SSC(=S)OCC  
**CHEMBL566136** Cc1c([s]c(N)c1C(=O)OCC)-c1ccccc1  
**CHEMBL16312** COc1ccc(cc1)C1=CC(=O)c2ccccc2O1  
**CHEMBL3191466** NC(=S)NN=CC1=COc2ccccc2C1=O  
**CHEMBL154580** C=CC(=O)c1cc2ccccc2cc1  
**CHEMBL505308** Oc1cc2CCNCC(c2cc1O)c1ccccc1  
**CHEMBL4061483** CCCC(=O)c1[s]c2[n]c(cc(c2c1N)-c1ccccc1)-c1ccc[s]1  
**CHEMBL1397952** Cc1cc(NC(c2ccc3ccc[n]c3c2O)c2ccc(OC)c(c2)OCC)[n]cc1  
**CHEMBL286080** Oc1cc2CCNCC(c2cc1O)c1ccccc1  
**CHEMBL418052** Nc1[n]c[n]c2c1[n]c[n]2C1OC(CSCCC(N)C(O)=O)C(O)C1O  
**CHEMBL3770443** Cc1ccccc([n]1)-c1ccc(c(Cl)c1)C1=Cc2c[n]c(NC)[n]c2N(CC2OCC(N)CO2)C1=O  
**CHEMBL1255778** NC(CO)C(=O)NNCc1ccc(O)c(O)c1O  
**CHEMBL1612112** Cc1ccc(cc1)S(=O)(=O)c1c(NS(=O)(=O)c2ccccc2)[n](CC=C)c2[n]c3ccccc3[n]c21  
**CHEMBL119171** NC1Ne2c([n]c[n]2C2OC(CO)C(O)C2O)C(=S)N=1  
**CHEMBL1208422** OC(=O)c1c(C2c3cc(I)c(O)c(I)c3OC3C=2C=C(I)C(=O)C=3I)c(Cl)c(Cl)c(Cl)c1Cl  
**CHEMBL1256832** Oc1cc2CCC3NCc4ccccc4C3c2cc1O  
**CHEMBL4559134** COc1ccc(CN2C3CN(CC2C3)c2ccc(c[n]2)-c2ccc(c[n]3[n]cc(C#N)c32)OCC(C)(C)O)c[n]1  
**CHEMBL155103** CCOC(=O)C1=Cc2ccc(O)cc2OC1=O  
**CHEMBL2269009** S=C1NN=C(O1)c1ccccc1Cl  
**CHEMBL243644** COc1ccc(cc1)NC(=O)CC1Sc2[n]c[n][n]2C1=O

|                      |                                                                                                                                         |
|----------------------|-----------------------------------------------------------------------------------------------------------------------------------------|
| <b>CHEMBL508112</b>  | <chem>c1cccc2[s]c([n]c21)SSc1[n]c2cccc2[s]1</chem>                                                                                      |
| <b>CHEMBL50588</b>   | <chem>CCC1CN2CCc3cc(OC)c(cc3C2CC1CC1NCCc2cc(OC)c(cc21)OC)OC</chem>                                                                      |
| <b>CHEMBL168067</b>  | <chem>C[N+]1(C)CCC(CC1)OC(=O)C(c1cccc1)c1cccc1</chem>                                                                                   |
| <b>CHEMBL192627</b>  | <chem>O=C1C(Cl)=C(Cl)C(=O)C(Cl)=C1Cl</chem>                                                                                             |
| <b>CHEMBL4303240</b> | <chem>Oc1cc2OC(=O)C=Cc2cc1OC1OC(CO)C(O)C(O)C1O</chem>                                                                                   |
| <b>CHEMBL449298</b>  | <chem>Nc1ccc(O)c2[n]cccc21</chem>                                                                                                       |
| <b>CHEMBL3665060</b> | <chem>CN1CCN(CC1)C(=O)c1ccc([s]1)-c1cc2ccc(O)c(C=O)c2cc1</chem>                                                                         |
| <b>CHEMBL45152</b>   | <chem>O=C1c2cccc2SN1c1cccc1</chem>                                                                                                      |
| <b>CHEMBL1339149</b> | <chem>CN(C)S(=O)(=O)c1cc(ccc1)N1Se2cccc2C1=O</chem>                                                                                     |
| <b>CHEMBL570345</b>  | <chem>O[n+]1o[n]c(c1C(=O)c1ccc[s]1)C(=O)c1ccc[s]1</chem>                                                                                |
| <b>CHEMBL481049</b>  | <chem>COc1cc(OC)c2C=CC(=O)Oc2c1</chem>                                                                                                  |
| <b>CHEMBL156592</b>  | <chem>CN1CC2CC1CN2c1cc2c(cc1F)C(=O)C(=CN2C1CC1)C(O)=O</chem>                                                                            |
| <b>CHEMBL1096979</b> | <chem>NC(CO)C(=O)NNCc1ccc(O)c(O)c1O</chem>                                                                                              |
| <b>CHEMBL275938</b>  | <chem>OC(=O)C1=CC(C=CC1=O)=C(c1cc(c(O)cc1)C(O)=O)c1cc(c(O)cc1)C(O)=O</chem>                                                             |
| <b>CHEMBL299784</b>  | <chem>O=C1c2cccc2S(=O)(=O)N1CC1</chem>                                                                                                  |
| <b>CHEMBL940</b>     | <chem>NCC1(CC(O)=O)CCCCC1</chem>                                                                                                        |
| <b>CHEMBL289356</b>  | <chem>S=C1NN=C(Nc2cccc2)S1</chem>                                                                                                       |
| <b>CHEMBL1713178</b> | <chem>CCN(CC)S(=O)(=O)c1cc(ccc1)N1Se2cccc2C1=O</chem>                                                                                   |
| <b>CHEMBL311909</b>  | <chem>COc1cc(ccc1)NN=C1C=Cc2c(C1=O)c(N)c(cc2S(O)(=O)=O)S(O)(=O)=O)-c1cc(OC)c(cc1)NN=C1C=Cc2c(C1=O)c(N)c(cc2S(O)(=O)=O)S(O)(=O)=O</chem> |
| <b>CHEMBL1509639</b> | <chem>COc1cc2NC(=S)Nc2cc1</chem>                                                                                                        |
| <b>CHEMBL360055</b>  | <chem>CC[N+](CCOc1cccc(OCC[N+](CC)(CC)CC)c1OCC[N+](CC)(CC)CC)(CC)CC</chem>                                                              |
| <b>CHEMBL1336959</b> | <chem>Cc1ccc(cc1)N1Se2cccc2C1=O</chem>                                                                                                  |
| <b>CHEMBL3628274</b> | <chem>NCCCCC(NC(=O)C(Cc1ccc(cc1)C(N)=N)NC(=O)c1ccc(cc1)C(F)(F)F)C(=O)NC(c1cccc1)C(N)=O</chem>                                           |
| <b>CHEMBL3628261</b> | <chem>NCCCCC(NC(=O)C(Cc1ccc(cc1)C(N)=N)NC(=O)c1cccc1)C(=O)NC(c1cccc1)C(N)=O</chem>                                                      |
| <b>CHEMBL3335494</b> | <chem>NCCCCC(NC(=O)C(CCCNC(N)=N)NC(=O)c1cccc1)C(=O)NC(c1cccc1)C(N)=O</chem>                                                             |

We have described above protocols for curating data of interest to the antiviral drug discovery from ChEMBL database. The resulting SMACC database currently exists as a searchable Excel spreadsheet that we include for the public with this paper. This spreadsheet allows multiple approaches to identify compounds of interest. The approach described here in Methods, i.e., removing compounds with conflicting activity calls from our final BSA activity analysis, was stringent and resulted in a concise list of potential BSA compounds that we had the highest confidence in. While the filtering criteria described above were appropriate to achieve our project's objective, we acknowledge the value of extracting different subsets of the SMACC database using different criteria depending on the study objectives, and SMACC database (even in the form of an Excel spreadsheet) enables multiple analyses.

For instance, in contrast with the approach described above, another method for identifying BSA compounds would be to consider all compounds with at least one active assay result against two or more viruses. This would increase the number of compounds considered in the analysis because inconclusive entries would not be removed as described above. To do this, we created a subset of the SMACC database with all compound entries reported as active in phenotypic assays, enumerated the number of viruses the compounds were reported active against and removed all compounds reported active against only one virus. This approach

resulted in 21 new hit compounds identified from phenotypic assays (Table S12) and 10 new hit compounds from target based assays that were not identified in the previous approach (Table S13). One could also search the database for actives using some threshold of activity calls, setting a percentage of active assay results compared to inactive at a specific virus or viral target.

As mentioned above, there are currently only 90 antiviral drugs approved for treating nine human infectious diseases (Erik and Guangdi, 2016). We utilized SMACCs filtering tools to enumerate their presence in our database. Currently, SMACC includes chemogenomics data for RSV and two strains of human influenza virus (H1N2 and H7N7), which covers only two of nine diseases with approved drugs. Despite this, we identified 53 of 90 approved drugs in our phenotypic dataset and 57 of 90 in our target-based dataset (Table S14). The compounds with reported active assay results are summarized in Table 3. Clearly, these drugs have broader activity than they are approved for. Further experimental testing based on hypotheses from this table will be extremely valuable to understanding their broad-spectrum potential.

**Table S12.** Additional compounds identified as potential hits due to activity in at least one phenotypic assay, regardless of inactivity in another assay.

| Molecule ChEMBL ID | SMILES                                                                                                                                                                               | Viruses-active (#data points)                                                                                                                                                                                                                     |
|--------------------|--------------------------------------------------------------------------------------------------------------------------------------------------------------------------------------|---------------------------------------------------------------------------------------------------------------------------------------------------------------------------------------------------------------------------------------------------|
| CHEMBL866          | <chem>COc1c(C)c2c(c(O)c1CC=C(C)CCC(=O)O)C(=O)OC2</chem>                                                                                                                              | SARS-CoV-2, RSV(3), HPIV-3(2), Dengue Virus(4), West Nile Virus(2), Yellow Fever Virus(2), HPIV-3(3), Sandfly_Fever(1), Dengue Virus(3), Yellow Fever Virus(1), RSV(19) Dengue Virus(4), West Nile Virus(4), Yellow Fever Virus(2), SARS-CoV-2(1) |
| CHEMBL1643         | <chem>NC(=O)c1ncn(C2OC(CO)C(O)C2O)n1</chem>                                                                                                                                          | SARS-CoV-2(3), Zika Virus(3), Dengue Virus(1)                                                                                                                                                                                                     |
| CHEMBL160          | <chem>CC=CCC(C)C(O)C1C(=O)NC(CC)C(=O)N(C)CC(=O)N(C)C(CC(C)C)C(=O)NC(C(C)C)C(=O)N(C)C(CC(C)C)C(=O)NC(C)C(=O)NC(C)C(=O)N(C)C(CC(C)C)C(=O)N(C)C(CC(C)C)C(=O)N(C)C(C(C)C)C(=O)N1C</chem> | SARS-CoV-2(3), Zika Virus(3), Dengue Virus(1)                                                                                                                                                                                                     |
| CHEMBL76           | <chem>CCN(CC)CCCC(C)Nc1ccnc2cc(Cl)ccc12</chem>                                                                                                                                       | SARS-CoV-2(2), Dengue Virus(1)                                                                                                                                                                                                                    |
| CHEMBL1397         | <chem>CCC(C(C)O)n1ncn(-c2ccc(N3CCN(c4ccc(OCC5COC(Cn6cncn6)(c6ccc(F)cc6F)C5)cc4)CC3)cc2)j1=O</chem>                                                                                   | Dengue Virus(14), SARS-CoV-2(1)                                                                                                                                                                                                                   |
| CHEMBL1421         | <chem>Cc1nc(Nc2ncc(C(=O)Nc3c(C)cccc3Cl)s2)cc(N2CCN(CCO)CC2)n1</chem>                                                                                                                 | SARS-CoV-2(2), Dengue Virus(1)                                                                                                                                                                                                                    |
| CHEMBL1448         | <chem>O=C(Nc1ccc([N+](=O)[O-])cc1Cl)c1cc(Cl)ccc1O</chem>                                                                                                                             | SARS-CoV-2(2), Zika Virus(1)                                                                                                                                                                                                                      |
| CHEMBL147806       | <chem>CC(C)(C)NCc1ccc(Nc2ccnc3cc(Cl)ccc23)cc1O</chem>                                                                                                                                | SARS-CoV-2(2), Dengue Virus(5)                                                                                                                                                                                                                    |
| CHEMBL1535         | <chem>CCN(CCO)CCCC(C)Nc1ccnc2cc(Cl)ccc12</chem>                                                                                                                                      | Dengue Virus(10), West Nile Virus(1)                                                                                                                                                                                                              |
| CHEMBL1631361      | <chem>Clc1ccc(-c2ccc(-c3nc(NCc4cccnc4)nc4cccc34)s2)cc1</chem>                                                                                                                        | Dengue Virus(4), SARS-CoV-2(1)                                                                                                                                                                                                                    |
| CHEMBL1650595      | <chem>NCC(=O)Nc1ccc(-n2nc(C(F)(F)F)cc2-c2ccc3c(ccc4cccc43)c2)cc1</chem>                                                                                                              | Dengue Virus(2), West Nile Virus(1)                                                                                                                                                                                                               |
| CHEMBL1652118      | <chem>CC1CCC(C(C)C)C(OCCCCCN2CC(O)C(O)C(O)C2CO)C1</chem>                                                                                                                             | Dengue Virus(2), West Nile Virus(1)                                                                                                                                                                                                               |
| CHEMBL1652119      | <chem>Cc1ccc(C)c(OCCCCCN2CC(O)C(O)C(O)C2CO)c1</chem>                                                                                                                                 | Dengue Virus(2), West Nile Virus(1)                                                                                                                                                                                                               |
| CHEMBL1652120      | <chem>CC1CCCCC1OCCCCCN1CC(O)C(O)C(O)C1CO</chem>                                                                                                                                      | Dengue Virus(2), West Nile Virus(1)                                                                                                                                                                                                               |
| CHEMBL3578033      | <chem>Cc1cn(C2CC(n3nccc3-c3ccccc3)C(CO[Si](C)(C)C(C)C(C)C)O2)c(=O)[nH]c1=O</chem>                                                                                                    | West Nile Virus(2), Dengue Virus(1)                                                                                                                                                                                                               |

|               |                                                                                     |                                        |
|---------------|-------------------------------------------------------------------------------------|----------------------------------------|
| CHEMBL36      | <chem>CCc1nc(N)nc(N)c1-c1cccc(Cl)cc1</chem>                                         | RSV(1), SARS-CoV-2(1)                  |
| CHEMBL4065616 | <chem>CCC(CC)COC(=O)C(C)NP(=O)(OCC1OC(C#N)(c2ccc3c(N)ncnn23)C(O)C1O)Oe1cccc1</chem> | RSV(1), SARS-CoV-2(4)                  |
| CHEMBL4438019 | <chem>O=C(C=Cc1cccc1)NC(CC1CCCC1)C(=O)NC(CC1CCNC1=O)C(=O)C(=O)NCc1cccc1</chem>      | MERS-CoV(1), HCoV-229E(1)              |
| CHEMBL4442435 | <chem>O=C(C=Cc1cccc1)NC(CC1CC1)C(=O)NC(CC1CCNC1=O)C(=O)C(=O)NCc1cccc1</chem>        | MERS-CoV(1), HCoV-229E(1)              |
| CHEMBL453392  | <chem>O=C(O)c1c[nH]c2c(c1=O)c(=O)n(Cc1cccc1)c(=O)n2Cc1cccc1</chem>                  | Yellow Fever Virus(1), Dengue Virus(1) |
| CHEMBL4556306 | <chem>COc1ccc(S(=O)(=O)N(CCCC(=O)C2CCCCC2)c2cccc2)cc1</chem>                        | Dengue Virus(17), Zika Virus(16)       |

**Table S13.** Additional compounds identified as potential hits due to activity in at least one target-based assay, regardless of inactivity in another assay.

| Molecule      | ChEMBL ID | SMILES                                                                                                                                                                                                                                          | Viruses-active          | Target-active (#data points)                          |
|---------------|-----------|-------------------------------------------------------------------------------------------------------------------------------------------------------------------------------------------------------------------------------------------------|-------------------------|-------------------------------------------------------|
| CHEMBL4452943 |           | <chem>COc1ccc(CC2C(=O)NC(CCCCN)C(=O)N(C)C(Cc3cccc3)C(=O)NC(CCCCN)C(=O)N(C)C(CO)C(=O)N(C)C(Cc3ccc(OC)cc3)C(=O)NC(CCCCN)C(=O)N(C)C(Cc3ccc(OC)cc3)C(=O)N(C)C(Cc3ccc(OC)cc3)C(=O)NC(CCCCN)C(=O)NC(CN)=O)CSCC(=O)NC(Cc3ccc(O)cc3)C(=O)N2C)cc1</chem> | Dengue, Zika, West Nile | NS2B-NS3 Protease(7)                                  |
| CHEMBL4483351 |           | <chem>CCC(C)C1NC(=O)C(C(C(N)=O)NC(=O)C(C(C)C)NC(=O)C(CC(C)C)N(C(=O)C(C(C)O)NC(=O)C(CC(N)=O)NC(=O)C(Cc2ccc(OC)cc2)N(C)C(=O)C(C(C)CC)NC(=O)C(CCCCN)NC(=O)C(Cc2c[nH]c3cccc23)NC(=O)C(Cc2ccc(O)cc2)NC(=O)CSCC(C(N)=O)NC1=O</chem>                   | Dengue, Zika, West Nile | NS2B-NS3 Protease(6)                                  |
| CHEMBL164     |           | <chem>O=c1c(O)c(-c2cc(O)c(O)c(O)c2)oc2cc(O)cc(O)c12</chem>                                                                                                                                                                                      | Zika, SARS-CoV-2        | NS2B-NS3 Protease(2), Main Protease (3CLpro, Mpro)(4) |
| CHEMBL4435541 |           | <chem>N=C(N)NCCCC(NC(=O)c1cccc1)C(=O)NC(CCCCN)C(=O)NC(C(=O)NC1CN(c2cccc2)C1=O)c1ccc(OCc2cccc2)cc1</chem>                                                                                                                                        | Dengue, West Nile       | NS2B-NS3 Protease(5)                                  |
| CHEMBL4437757 |           | <chem>N=C(N)Nc1ccc(NC(=O)Oc2ccc(N)cc2)cc1</chem>                                                                                                                                                                                                | Dengue, West Nile       | NS2B-NS3 Protease(4)                                  |
| CHEMBL4463470 |           | <chem>N=C(N)NCCCC(NC(=O)c1cccc1)C(=O)NC(C</chem>                                                                                                                                                                                                | Dengue, West Nile       | NS2B-NS3 Protease(2)                                  |

|               |                                                                                                              |                   |                      |
|---------------|--------------------------------------------------------------------------------------------------------------|-------------------|----------------------|
| CHEMBL4464884 | <chem>CCN)C(=O)NC1CN(c2cccc2)C1=O</chem>                                                                     | Dengue, West Nile | NS2B-NS3 Protease(3) |
| CHEMBL4469272 | <chem>CC(NC(=O)C(CCCCN)NC(=O)C(CCCNC(=N)N)NC(=O)c1cccc1)(C(N)=O)c1cccc1</chem>                               | Dengue, West Nile | NS2B-NS3 Protease(3) |
| CHEMBL4545602 | <chem>Cc1ccc(N2CC(NC(=O)C(NC(=O)C(CCCCN)NC(=O)C(CCCNC(=N)N)NC(=O)c3cccc3)c3cc(OCc4cccc4)cc3)C2=O)cc1</chem>  | Dengue, West Nile | NS2B-NS3 Protease(2) |
| CHEMBL4561419 | <chem>N=C(N)NCCCC(NC(=O)c1cccc1)C(=O)NC(CCCN)C(=O)NC(C(=O)N)C1CN(c2cccc(F)c2)C1=O)c1ccc(OCc2cccc2)cc1</chem> | Dengue, West Nile | NS2B-NS3 Protease(2) |

**Table S14.** List of approved antiviral drugs present in the SMACC database, including the viruses and targets the compounds were reported active against.

| Compound Information |              |               | Presence in SMACC |              |              |       |                  |
|----------------------|--------------|---------------|-------------------|--------------|--------------|-------|------------------|
| Drug name            | Approved Use | ChEMBL ID     | Phenotypic Data   | Active Virus | Target Based | Virus | Active Target    |
| Cidofovir            | CMV          | CHEMBL152     | Yes               |              | Yes          |       |                  |
| Adefovir             |              |               |                   |              |              |       |                  |
| dipivoxil            | HBV          | CHEMBL922     | Yes               |              | Yes          |       |                  |
| Telbivudine          | HBV          | CHEMBL374731  | Yes               |              | Yes          |       |                  |
| Ganciclovir          | HCMV         | CHEMBL182     | Yes               |              | Yes          |       |                  |
| Simeprevir           | HCV          | CHEMBL501849  | Yes               |              | Yes          | H7N7  | Matrix Protein 2 |
| Paritaprevir         | HCV          | CHEMBL3391662 | Yes               |              | Yes          |       |                  |
| Dasabuvir            | HCV          | CHEMBL3137312 | Yes               |              | Yes          |       |                  |
| Ombitasvir           | HCV          | CHEMBL3127326 | Yes               |              | Yes          |       |                  |
| Elbasvir             | HCV          | CHEMBL3039514 |                   |              | Yes          |       |                  |
| Ledipasvir           | HCV          | CHEMBL2374220 |                   |              | Yes          |       |                  |
| Telaprevir           | HCV          | CHEMBL231813  |                   |              | Yes          |       |                  |
| Boceprevir           | HCV          | CHEMBL218394  | Yes               |              | Yes          |       |                  |
| Asunaprevir          | HCV          | CHEMBL2105735 | Yes               |              | Yes          | H7N7  | Matrix Protein 2 |
| Grazoprevir          | HCV          | CHEMBL2063090 | Yes               |              | Yes          |       |                  |
| Daclatasvir          | HCV          | CHEMBL2023898 |                   |              | Yes          |       |                  |
| Sofosbuvir           | HCV          | CHEMBL1259059 | Yes               | Dengue       | Yes          |       |                  |

|               |                         |               |     |  |                                                                    |     |                |                  |
|---------------|-------------------------|---------------|-----|--|--------------------------------------------------------------------|-----|----------------|------------------|
|               |                         |               |     |  | HPIV-3,<br>Sandfly<br>Fever,<br>Dengue,<br>Yellow<br>Fever,<br>RSV | Yes |                |                  |
| Ribavirin     | HCV, RSV                | CHEMBL1643    | Yes |  |                                                                    |     |                |                  |
| Stavudine     | HIV                     | CHEMBL991     | Yes |  |                                                                    |     |                |                  |
| Emtricitabine | HIV                     | CHEMBL885     | Yes |  |                                                                    |     |                |                  |
| Zalcitabine   | HIV                     | CHEMBL853     | Yes |  |                                                                    |     |                |                  |
|               |                         |               |     |  | SARS-<br>CoV-2                                                     | Yes |                |                  |
| Lopinavir     | HIV                     | CHEMBL729     | Yes |  |                                                                    |     |                |                  |
| Nelfinavir    | HIV                     | CHEMBL584     | Yes |  | Dengue                                                             |     |                |                  |
| Raltegravir   | HIV                     | CHEMBL254316  | Yes |  |                                                                    | Yes | H7N7           | Matrix Protein 2 |
|               |                         |               |     |  |                                                                    |     | SARS-<br>CoV-2 |                  |
| Elvitegravir* | HIV                     | CHEMBL204656  | Yes |  |                                                                    | Yes |                | 3CLpro           |
| Ritonavir     | HIV                     | CHEMBL163     | Yes |  |                                                                    | Yes |                |                  |
| Didanosine    | HIV                     | CHEMBL1460    |     |  |                                                                    | Yes |                |                  |
| Darunavir     | HIV                     | CHEMBL1323    | Yes |  |                                                                    |     |                |                  |
| Zidovudine    | HIV                     | CHEMBL129     | Yes |  |                                                                    |     |                |                  |
| Dolutegravir  | HIV                     | CHEMBL1229211 | Yes |  |                                                                    | Yes |                |                  |
| Maraviroc     | HIV                     | CHEMBL1201187 | Yes |  |                                                                    | Yes |                |                  |
|               |                         |               |     |  |                                                                    |     | SARS-<br>CoV-2 |                  |
| Atazanavir    | HIV                     | CHEMBL1163    | Yes |  |                                                                    | Yes |                | 3CLPro           |
| Indinavir     | HIV                     | CHEMBL115     | Yes |  |                                                                    | Yes |                |                  |
| Delavirdine   | HIV-1                   | CHEMBL593     |     |  |                                                                    | Yes |                |                  |
| Nevirapine    | HIV-1                   | CHEMBL57      | Yes |  |                                                                    | Yes |                |                  |
| Etravirine    | HIV-1                   | CHEMBL308954  | Yes |  |                                                                    | Yes |                |                  |
| Efavirenz     | HIV-1                   | CHEMBL223228  |     |  |                                                                    | Yes |                |                  |
| Tipranavir    | HIV-1                   | CHEMBL222559  | Yes |  |                                                                    | Yes |                |                  |
|               |                         |               |     |  | SARS-<br>CoV-2                                                     | Yes |                |                  |
| Rilpivirine   | HIV-1                   | CHEMBL175691  | Yes |  |                                                                    | Yes |                |                  |
| Fosamprenavir | HIV-1                   | CHEMBL1664    | Yes |  |                                                                    | Yes |                |                  |
| Amprenavir    | HIV-1                   | CHEMBL116     | Yes |  |                                                                    | Yes |                |                  |
| TDF           | HIV, HBV                | CHEMBL1538    | Yes |  |                                                                    | Yes |                |                  |
| Lamivudine    | HIV, HBV                | CHEMBL141     | Yes |  |                                                                    | Yes |                |                  |
|               | HPV-related<br>diseases |               |     |  |                                                                    |     |                |                  |
| Imiquimod     |                         | CHEMBL1282    | Yes |  |                                                                    | Yes |                |                  |



|                       |                      |               |     |        |     |      |               |
|-----------------------|----------------------|---------------|-----|--------|-----|------|---------------|
|                       | HPV-related          |               |     | SARS-  |     |      |               |
| Podofilox             | diseases             | CHEMBL61      | Yes | CoV-2  | Yes |      |               |
| Penciclovir           | HSV                  | CHEMBL1540    | Yes |        | Yes |      |               |
| Docosanol             | HSV                  | CHEMBL1200453 | Yes |        | Yes |      |               |
| Trifluridine          | HSV                  | CHEMBL1129    | Yes | HPIV-3 | Yes |      |               |
| Idoxuridine           | HSV-1                | CHEMBL788     | Yes |        | Yes | Zika | NS5           |
| Brivudine             | HSV-1,VZV            | CHEMBL31634   | Yes |        | Yes |      |               |
| Acyclovir             | HSV, VZV             | CHEMBL184     | Yes |        | Yes | H7N7 | Neuraminidase |
| Valaciclovir          | HSV, VZV             | CHEMBL1349    |     |        | Yes |      |               |
| Vidarabine            | HSV, VZV             | CHEMBL1090    | Yes |        | Yes |      |               |
| Famciclovir           | HSV,VZV              | CHEMBL880     | Yes |        | Yes |      |               |
| Rimantadine           | Influenza A          | CHEMBL959     | Yes |        | Yes |      |               |
| Amantadine            | Influenza A          | CHEMBL660     | Yes |        | Yes |      |               |
| Laninamivir octanoate | Influenza A and B    | CHEMBL467058  |     |        | Yes |      |               |
| Zanamivir             | Influenza A and B    | CHEMBL222813  | Yes | H7N7   | Yes |      |               |
| Peramivir             | Influenza A and B    | CHEMBL139367  | Yes |        | Yes |      |               |
| Oseltamivir           | Influenza A, B and B | CHEMBL1229    | Yes |        | Yes |      |               |
| Favipiravir           | Influenza A, B and C | CHEMBL221722  | Yes |        | Yes |      |               |

## Comment on Viral ChEMBL

Efforts similar to ours have been made to collect antiviral data prior to the SARS-CoV-2 outbreak. There is a collection of antiviral activity data from ChEMBL with enhanced taxonomy annotations as a tool for studying the antiviral chemical space that the authors dubbed “Viral ChEMBL” (Nikitina et al., 2019). Viral ChEMBL was compiled using information collected on compounds related to many virus types (human, animal, plant) and additional curation was performed to the data by mapping lists for assay and target organism data and using a dictionary of virus-related terms. While this collection is quite valuable to the field, it is based on an old version of ChEMBL20 (released in 2015, the current release is ChEMBL29) and some data are not relevant to human disease. Thus, our database was collected and manually curated to provide

a structured, annotated repository of all data available in the most current version of ChEMBL for viruses that hold the greatest risk for human contraction and pandemic potential.

**Table S15.** Additional resources for SARS-CoV-2 drug discovery

| <b>Source</b>                           | <b>Link</b>                                                                                                                                                     | <b>Description</b>                                                                    |
|-----------------------------------------|-----------------------------------------------------------------------------------------------------------------------------------------------------------------|---------------------------------------------------------------------------------------|
| PubMed                                  | <a href="https://www.ncbi.nlm.nih.gov/sars-cov-2/">https://www.ncbi.nlm.nih.gov/sars-cov-2/</a>                                                                 | SARS-CoV-2 Data Resource                                                              |
| European Bioinformatics Institute (EBI) | <a href="https://www.covid19dataportal.org">https://www.covid19dataportal.org</a>                                                                               | Comprehensive COVID-19 Data Portal                                                    |
| ChEMBL database                         | <a href="https://www.ebi.ac.uk/chembl/">https://www.ebi.ac.uk/chembl/</a>                                                                                       | A collection of over 20,000 screening results for compounds tested against SARS-CoV-2 |
| NCATS at the NIH                        | <a href="https://opendata.ncats.nih.gov/covid19/index.html">https://opendata.ncats.nih.gov/covid19/index.html</a>                                               | Target specific and phenotypic screening results of chemical libraries in SARS-CoV-2  |
| Kaggle                                  | <a href="https://www.kaggle.com/allen-institute-for-ai/CORD-19-research-challenge">https://www.kaggle.com/allen-institute-for-ai/CORD-19-research-challenge</a> | CORD-19                                                                               |
| MML UNC                                 | <a href="https://coke.mml.unc.edu">https://coke.mml.unc.edu</a>                                                                                                 | CoKE: COVID-19 Knowledge Extractor                                                    |
